# Reward-driven changes in striatal pathway competition shape evidence evaluation in decision-making

Kyle Dunovan<sup>1,2†</sup>, Catalina Vich<sup>3†</sup>, Matthew Clapp<sup>4</sup>, Timothy Verstynen<sup>1,2\*¶</sup>, Jonathan Rubin<sup>2,5\*¶</sup>

**\*For correspondence:**

[timothyv@andrew.cmu.edu](mailto:timothyv@andrew.cmu.edu) (TV);  
[jonrubin@pitt.edu](mailto:jonrubin@pitt.edu) (JR)

<sup>†</sup>These authors contributed equally to this work

<sup>¶</sup>These authors also contributed equally to this work

<sup>1</sup>Dept. of Psychology, Carnegie Mellon University; <sup>2</sup>Center for the Neural Basis of Cognition; <sup>3</sup>Dept. de Matemàtiques i Informàtica, Universitat de les Illes Balears; <sup>4</sup>Dept. of Biomedical Engineering, University of South Carolina; <sup>5</sup>Dept. of Mathematics, University of Pittsburgh

**Abstract** Cortico-basal-ganglia-thalamic (CBGT) networks are critical for adaptive decision-making, yet how changes to circuit-level properties impact cognitive algorithms remains unclear. Here we explore how dopaminergic plasticity at corticostriatal synapses alters competition between striatal pathways, impacting the evidence accumulation process during decision-making. Spike-timing dependent plasticity simulations showed that dopaminergic feedback based on rewards modified the ratio of direct and indirect corticostriatal weights within opposing action channels. Using the learned weight ratios in a full spiking CBGT network model, we simulated neural dynamics and decision outcomes in a reward-driven decision task and fit them with a drift-diffusion model. Fits revealed that the rate of evidence accumulation varied with inter-channel differences in direct pathway activity while boundary height varied with overall indirect pathway activity. This multi-level modeling approach demonstrates how complementary learning and decision computations emerge from corticostriatal plasticity.

## Introduction

The flexibility of mammalian behavior showcases the dynamic range over which neural circuits can be modified by experience and the robustness of the emergent cognitive algorithms that guide goal-directed actions. Decades of research in cognitive science has independently detailed the algorithms of decision-making (e.g., accumulation-to-bound models, *Ratcliff (1978)*) and reinforcement learning (RL; *Sutton et al. (1998)*; *Rescorla et al. (1972)*), providing foundational insights into the computational principles of adaptive decision-making. In parallel, research in neuroscience has shown how the selection of actions, and the use of feedback to modify selection processes, both rely on a common neural substrate: cortico-basal ganglia-thalamic (CBGT) circuits (*Doya, 2008*; *Bogacz and Gurney, 2007*; *Balleine et al., 2007*; *Dunovan and Verstynen, 2016*).

Understanding how the cognitive algorithms for adaptive decision-making emerge from the circuit-level dynamics of CBGT pathways requires a careful mapping across levels of analysis (*Marr and Poggio, 1976*), from circuits to algorithm (see also *Krakauer et al. (2017)*; *Simen et al. (2006)*). Previous simulation studies have demonstrated how the specific circuit-level computations of CBGT pathways map onto sub-components of the multiple sequential probability ratio test (MSPRT; *Bo-*

40 *gacz and Gurney (2007); Bogacz (2007)*), a simple algorithm of information integration that selects  
 41 single actions from a competing set of alternatives based on differences in input evidence (*Draglia*  
 42 *et al., 1999; Baum and Veeravalli, 1994*). Allowing a simplified form of RL to modify corticostri-  
 43 atal synaptic weights results in an adaptive variant of the MSPRT that approximates the optimal  
 44 solution to the action selection process based on both sensory signals and feedback learning  
 45 (*Bogacz and Larsen, 2011; Caballero et al., 2018*). Previous attempts at multi-level modeling have  
 46 largely adopted a "downwards mapping" approach, whereby the stepwise operations prescribed  
 47 by computational or algorithmic models are intuitively mapped onto plausible neural substrates.  
 48 Recently, *Frank (2015)* proposed an alternative "upwards mapping" approach for bridging levels  
 49 of analysis, where biologically detailed models are used to simulate behavior that can be fit to a  
 50 particular cognitive algorithm. Rather than ascribing different neural components with explicit  
 51 computational roles, this variant of multi-level modeling examines how cognitive mechanisms  
 52 are influenced by changes in the functional dynamics or connectivity of those components. A  
 53 key assumption of the upwards mapping approach is that variability in the configuration of CBGT  
 54 pathways should drive systematic changes in specific sub-components of the decision process,  
 55 expressed by the parameters of the drift-diffusion model (DDM; *Ratcliff (1978)*). Indeed, by fitting  
 56 the DDM to synthetic choice and response time data generated by a rate-based CBGT network,  
 57 *Ratcliff and Frank (2012)* showed how variation in the height of the decision threshold tracked  
 58 with changes in the strength of subthalamic nucleus (STN) activity. Thus, this example shows how  
 59 simulations that map up the levels of analysis can be used to investigate the emergent changes in  
 60 information processing that result from targeted modulation of the underlying neural circuitry.

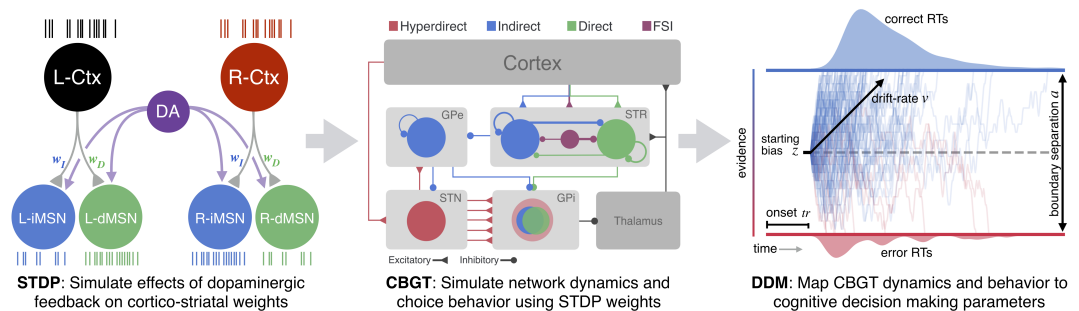

**Figure 1.** Multi-level modeling design. Left: An STDP model of DA effects on Ctx-dMSN and Ctx-iMSN synapses is used to determine how phasic DA signals affect the balance of these synapses. Middle: A spiking model of the CBGT pathways simulates behavioral responses, under different conditions of Ctx-MSN efficacy based on the STDP simulations. Right: The simulated behavioral responses from the full CBGT network model are then fit to a DDM of two-alternative choice behavior. Notation:  $j - Ctx$  - cortical population,  $j - dMSN$  - direct pathway striatal neurons,  $j - iMSN$  - indirect pathway striatal neurons ( $j \in \{L, R\}$ ); DA - dopamine signal; STR - striatum; GPe - globus pallidus external segment; STN - subthalamic nucleus; GPI - globus pallidus internal segment; FSI - fast spiking interneuron; RT - reaction time;  $v$  - DDM drift rate;  $a$  - separation between boundaries in DDM;  $z$  - bias in starting height of DDM;  $tr$  - time after which evidence accumulation begins in DDM.

61 Motivated by the predictions of a recently proposed Believer-Skeptic hypothesis of CBGT pathway  
 62 function (*Dunovan and Verstynen, 2016*), we utilize the upwards mapping approach to modeling  
 63 adaptive choice behavior across neural and cognitive levels of analysis (*Figure 1*). The Believer-  
 64 Skeptic hypothesis posits that competition between the direct (Believer) and indirect (Skeptic)  
 65 pathways within an action channel encodes the degree of uncertainty for that action. This competi-  
 66 tion is reflected in the drift rate of an accumulation-to-bound process (see *Dunovan et al. (2015)*).  
 67 Over time, dopaminergic (DA) feedback signals can sculpt the Believer-Skeptic competition to bias  
 68 decisions towards the behaviorally optimal target (*Bogacz and Larsen, 2011*). To explicitly test this  
 69 prediction, we first modeled how phasic DA feedback signals (*Schultz et al., 1992*) can modulate  
 70 the relative balance of corticostriatal synapses via spike-timing dependent plasticity (STDP; *Gurney*  
 71 *et al. (2015); Baladron et al. (2017)*), thereby promoting or deterring action selection. The effects

72 of learning on the synaptic weights were subsequently implemented in a spiking model of the full  
73 CBGT network meant to accurately capture the known physiological properties and connectivity pat-  
74 terns of the constituent neurons in these circuits (Wei et al., 2015). The performance (i.e., accuracy  
75 and response times) of the CBGT simulations were then fit using a hierarchical DDM (Wiecki and  
76 Frank, 2013). This progression from synapses to networks to behavior, allows us to explicitly test  
77 the mechanistic predictions of the Believer-Skeptic hypothesis by mapping how specific features  
78 of striatal activity that result from reward-driven changes in corticostriatal synaptic weights could  
79 underlie parameters of the fundamental cognitive algorithms of decision-making.

## 80 Results

### 81 STDP network results

82 To evaluate how dopaminergic plasticity impacts the efficacy of corticostriatal synapses, we modeled  
83 learning using a spike-timing dependent plasticity (STDP) paradigm in a simulation of corticostriatal  
84 networks implementing a simple two artificial forced choice task. In this scenario, one of two  
85 available actions, which we call left ( $L$ ) and right ( $R$ ), was selected by the spiking of model striatal  
86 medium spiny neurons (MSNs; *Action and rewards* subsection of *Methods*). These model MSNs were  
87 grouped into action channels receiving inputs from distinct cortical sources (Figure 1, left). Every  
88 time an action was selected, dopamine was released, after a short delay, at an intensity proportional  
89 to a reward prediction error (Equation 9 and Equation 10). All neurons in the network experienced  
90 this non-targeted increase in dopamine, emulating striatal release of dopamine by substantia nigra  
91 pars compacta neurons, leading to plasticity of corticostriatal synapses (Equation 8; see Figure 10).

92 The model network was initialized so that it did not a priori distinguish between  $L$  and  $R$  actions.  
93 We first performed simulations in which a fixed reward level was associated with each action, to  
94 assist in parameter tuning and verify effective model operation. In this scenario, where the rewards  
95 for each action did not change over time (i.e., one action always elicited a larger reward than the  
96 other), a gradual change in corticostriatal synaptic weights occurred (Supplementary Figure 1A)  
97 in parallel with the learning of the actions' values (Supplementary Figure 1B). These changes in  
98 synaptic weights induced altered MSN firing rates (Supplementary Figure 1C,D), reflecting changes  
99 in the sensitivity of the MSNs to cortical inputs in a way that allowed the network to learn over  
100 time to select the more highly rewarded action (Figure 2A). That is, firing rates in the direct pathway  
101 MSNs (dMSNs;  $D_L$  and  $D_R$ ) associated with the more highly rewarded action increased, lead to a  
102 more frequent selection of that action. On the other hand, firing rates of the indirect pathway MSNs  
103 (iMSNs;  $I_L$  and  $I_R$ ) remained quite similar (Supplementary Figure 1C,D). This similarity is consistent  
104 with recent experimental results (Donahue et al., 2018), while the finding that dMSNs and iMSNs  
105 associated with a selected action are both active has also been reported in several experimental  
106 works (Cui et al., 2013; Tecuapetla et al., 2014, 2016).

107 In this model, indirect pathway activity counters action selection by cancelling direct pathway  
108 spiking (*Action and rewards* subsection of *Methods*). This serves as a proxy in this simplified frame-  
109 work for indirect pathway competition with the direct pathway in the full network simulations (see  
110 *CBGT Dynamics and Choice Behavior* subsection of *Results*). Based on the cancellation framework, the  
111 ratio of direct pathway weights to indirect pathway weights provides a reasonable representation  
112 of the extent to which each action is favored or disfavored. In our simulations, after a long period  
113 of gradual evolution of weights and action values, the direct pathway versus indirect pathway  
114 weight ratio of the channel for the less favored action started to drop more rapidly, indicating the  
115 emergence of certainty about action values and a clearer separation between frequencies with  
116 which the two actions were selected (Figure 2).

117 To show that the network remained flexible after learning a specific action value relation, we ran  
118 additional simulations using a variety of reward schedules in which the reward values associated  
119 with the two actions were swapped after the performance of a certain number of actions. Once  
120 values switched, the network was always able to learn the new values. Specifically,  $Q_L$  and  $Q_R$

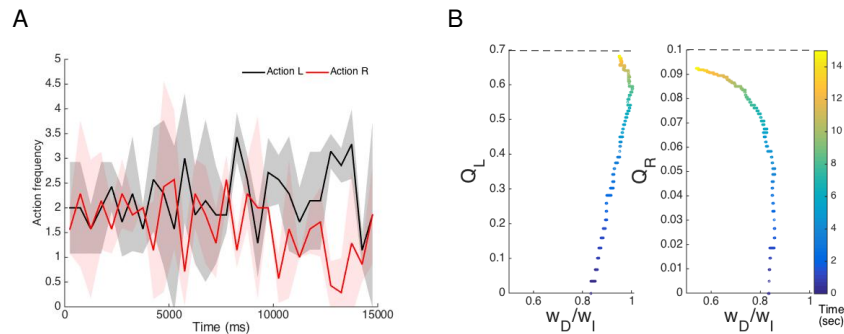

**Figure 2.** Constant reward task. A: Frequency of performance of  $L$  (black) and  $R$  (red) actions over time (discretized each 50 ms) when the rewards are held constant ( $r_L = 0.7$ ,  $r_R = 0.1$ ). Both traces are averaged across 7 different realizations. The transparent regions depict standard deviations. B: Estimates of the value of  $L$  ( $Q_L$ , left panel) and  $R$  ( $Q_R$ , right panel) versus the ratio of the corticostriatal weights to those dMSN neurons that facilitate the action and those iMSN that interfere with the action. Each trajectory is colored to show the progression of time. Even without full convergence of the action values  $Q_R$  and  $Q_L$  to their respective actual reward levels (B), a clear separation of action selection rates emerges (A).

121 began evolving toward the new reward levels, switching their relative magnitudes along the way; the  
 122 weights of corticostriatal synapses to  $L$ -dMSN ( $R$ -dMSN) weakened (strengthened) (e.g., **Appendix 1**  
 123 **Figure 1**), and the relative performance frequencies of the two actions also reversed. Thus the  
 124 network was able to adaptively learn immediate reward contingencies, without being restricted by  
 125 previously learned contingencies.

126 While these simulations show that applying a dopaminergic plasticity rule to corticostriatal  
 127 synapses allows for a simple network to learn action values linked to reward magnitude, many  
 128 reinforcement learning tasks rely on estimating reward probability (e.g., two armed bandit tasks).  
 129 To evaluate the network's capacity to learn from probabilistic rewards, we simulated a variant  
 130 of a probabilistic reward task and compared the network performance to previous experimental  
 131 results on action selection with probabilistic rewards in human subjects (**Frank et al., 2015**). For  
 132 consistency with experiments, we always used  $p_L + p_R = 1$ , where  $p_L$  and  $p_R$  were the probabilities  
 133 of delivery of a reward of size  $r_i = 1$  when actions  $L$  and  $R$  were performed, respectively. Moreover,  
 134 as in the earlier work, we considered the three cases  $p_L = 0.65$  (high conflict),  $p_L = 0.75$  (medium  
 135 conflict) and  $p_L = 0.85$  (low conflict).

136 As in the constant reward case, the corticostriatal synaptic weights onto the two dMSN pop-  
 137 ulations clearly separated out over time (**Figure 3**). The separation emerged earlier and became  
 138 more drastic as the conflict between the rewards associated with the two actions diminished, i.e.,  
 139 as reward probabilities became less similar. Interestingly, for relatively high conflict, corresponding  
 140 to relatively low  $p_L$ , the weights to both dMSN populations rose initially before those onto the  
 141 less rewarded population eventually diminished. This initial increase likely arises because both  
 142 actions yielded a reward of 1, leading to a significant dopamine increase, on at least some trials.  
 143 The weights onto the two iMSN populations remained much more similar. One general trend was  
 144 that the weights onto the  $L$ -iMSN neurons decreased, contributing to the bias toward action  $L$  over  
 145 action  $R$ .

146 In all three cases, the distinction in synaptic weights translated into differences across the dMSNs'  
 147 firing rates (**Figure 4**, first row), with  $L$ -dMSN firing rates ( $D_L$ ) increasing over time and  $R$ -dMSN  
 148 firing rates ( $D_R$ ) decreasing, resulting in a greater difference that emerged earlier when  $p_L$  was  
 149 larger and hence the conflict between rewards was weaker. Notice that the  $D_L$  firing rate reached  
 150 almost the same value for all three probabilities. In contrast, the  $D_R$  firing rate tended to smaller  
 151 values as the conflict decreased. As expected based on the changes in corticostriatal synaptic  
 152 weights, the iMSN population firing rates remained similar for both action channels, although the  
 153 rates were slightly lower for the population corresponding to the action that was more likely to

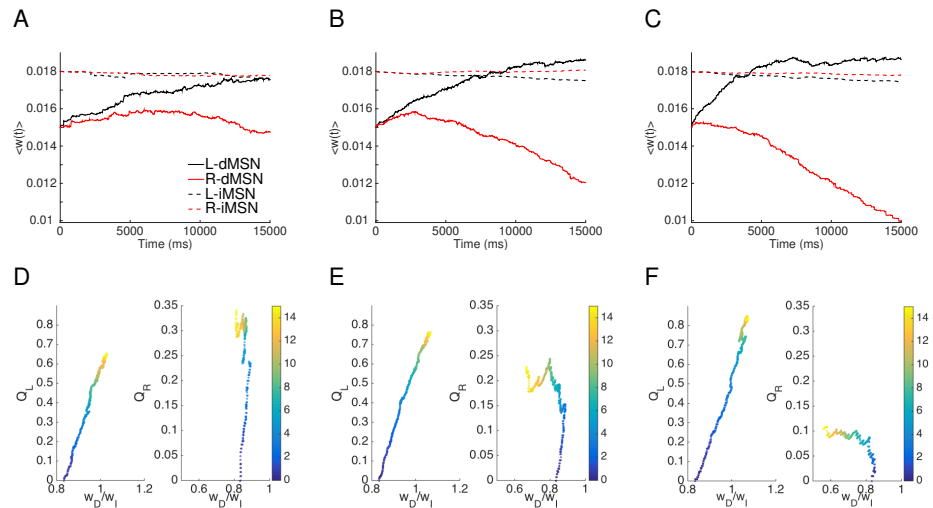

**Figure 3.** Corticostriatal synaptic weights when the reward traces are probabilistic. First column:  $p_L = 0.65$ ; second column:  $p_L = 0.75$ ; third column:  $p_L = 0.85$  case. A, B, and C: Averaged weights over each of four specific populations of neurons, which are dMSN neurons selecting action  $L$  (solid black); dMSN neurons selecting action  $R$  (solid red); iMSN neurons countering action  $L$  (dashed black); iMSN neurons countering action  $R$  (dashed red). D, E, and F: Evolution of the estimates of the value  $L$  ( $Q_L$ , left panel) and  $R$  ( $Q_R$ , right panel) versus the ratio of the corticostriatal weights to those dMSN neurons that facilitate the action versus the weights to those iMSN that interfere with the action. Both the weights and the ratios have been averaged over 8 different realizations.

154 yield a reward (Figure 4F).

155 Similar trends across conflict levels arose in the respective frequencies of selection of action  
 156  $L$ . Over time, as weights to  $L$ -dMSN neurons grew and their firing rates increased, action  $L$   
 157 was selected more often, becoming gradually more frequent than action  $R$ . Not surprisingly, a significant  
 158 difference between frequencies emerged earlier, and the magnitude of the difference became  
 159 greater, for larger  $p_L$  (Figure 5).

160 To show that this feedback learning captured experimental observations, we performed ad-  
 161 ditional probabilistic reward simulations to compare with behavioral data in forced-choice ex-  
 162 periments with human subjects (Frank et al., 2015). Each of these simulations represented an  
 163 experimental subject, and each action selection was considered as the outcome of one trial per-  
 164 formed by that subject. After each trial, a time period of 50 ms was imposed during which no cortical  
 165 inputs were sent to striatal neurons such that no actions would be selected, and then the full simu-  
 166 lation resumed. For these simulations, we considered the evolution of the value estimates for the two  
 167 actions either separately for each subject (Figure 6A) or averaged over all subjects experiencing the  
 168 same reward probabilities (Figure 6B), as well as the probability of selection of action  $L$  averaged  
 169 over subjects (Figure 6C). The mean in the difference between the action values gradually tended  
 170 toward the difference between the reward probabilities for all conflict levels. Although convergence  
 171 to these differences was generally incomplete over the number of trials we simulated (matched  
 172 to the experiment duration), these differences were close to the actual values for many individual  
 173 subjects as well as in mean (Figure 6A,B). These results agree quite well with the behavioral data in  
 174 Frank et al. (2015) obtained from 15 human subjects, as well as with observations from similar  
 175 experiments with rats (Tort et al., 2009). Also as in the experiments, the probability of selection of  
 176 the more rewarded action grew across trials for all three reward probabilities, with less separation  
 177 in action selection probability than in action values across different reward probability regimes  
 178 (Figure 6C). Although our actual values for the probabilities of selection of higher value actions did  
 179 not reach the levels seen experimentally, this likely reflected the non-biological action selection  
 180 rule in our STDP model (see Action and rewards subsection of Methods), whereas the agreement of

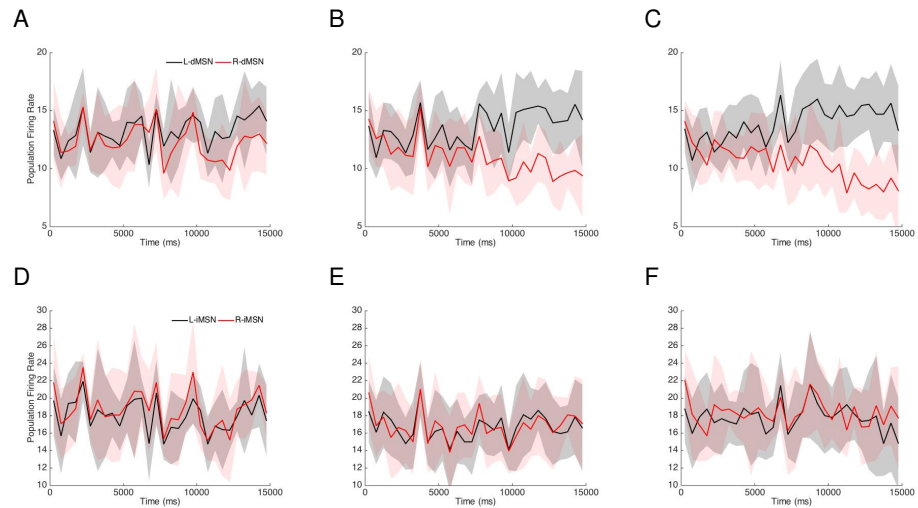

**Figure 4.** Firing rates when the reward traces are probabilistic. First column:  $p_L = 0.65$ ; second column:  $p_L = 0.75$ ; third column:  $p_L = 0.85$  case. A, B and C: Time courses of firing rates of the dMSNs selecting the  $L$  (black) and  $R$  (red) actions (50 ms time discretization). D, E, and F: Time courses of firing rates of the iMSNs countering the  $L$  (black) and  $R$  (red) actions (50 ms time discretization). In all cases, we depict the mean averaged across 8 different realizations, and the transparent regions represent standard deviations.

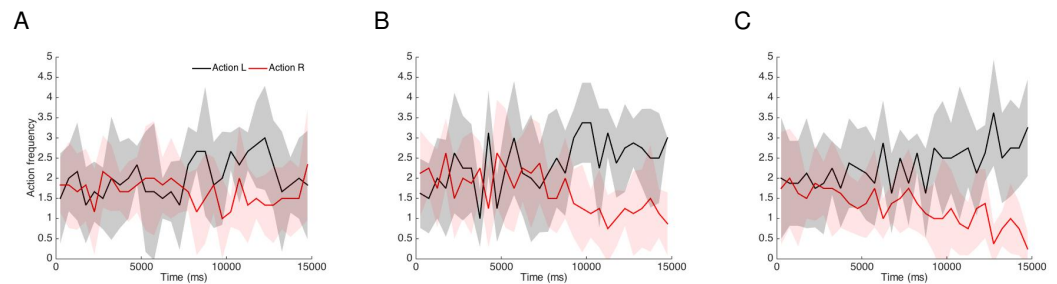

**Figure 5.** Action frequencies when reward delivery is probabilistic. All panels represent the number of  $L$  (black) and  $R$  (red) actions performed across time (discretized each 50 ms) when action selection is rewarded with probability  $p_L = 0.65$  (A),  $p_L = 0.75$  (B), or  $p_L = 0.85$  (C) with  $p_L + p_R = 1$ . Traces represent the means over 8 different realizations, while the transparent regions depict standard deviations.

181 our model performance with experimental time courses of value estimation (**Figure 6A,B**) and our  
 182 model's general success in learning to select more valuable actions (**Figure 1C**–Suppl. figure and  
 183 **Figure 5**) justify the incorporation of our results on corticostriatal synaptic weights into a spiking  
 184 network with a more biologically-based decision-making mechanism, which we next discuss.

### 185 **CBGT Dynamics and Choice Behavior**

186 A key observation from our STDP model is that differences in rewards associated with different  
 187 actions lead to differences in the ratios of corticostriatal synaptic weights to dMSN and iMSNs  
 188 across action channels. Using weight ratios adapted from the STDP model, obtained by varying  
 189 weights to dMSNs with fixed weights to iMSNs (Figure 3), we next performed simulations with a  
 190 full spiking CBGT network to study the effects of this corticostriatal imbalance on the emergent  
 191 neural dynamics and choice behavior following feedback-dependent learning in the context of  
 192 low, medium, and high probability reward schedules (2500 trials/condition; see *Neural dynamics*  
 193 subsection of *Methods* for details). In each simulation, cortical inputs featuring gradually increasing  
 194 firing rates were supplied to both action channels, with identical statistical properties of inputs  
 195 to both channels. These inputs led to evolving firing rates in nuclei throughout the basal ganglia,

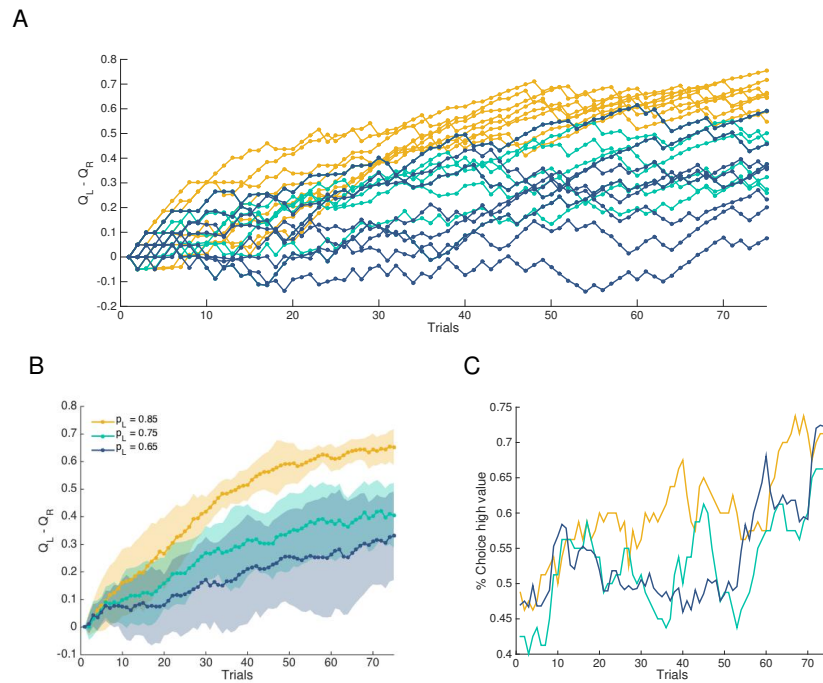

**Figure 6.** Relative action value estimates and action selection probabilities over simulated action selection trials with probabilistic reward schedules, with  $p_L = 0.65$  (dark blue),  $p_L = 0.75$  (cyan),  $p_L = 0.85$  (yellow) and  $p_L + p_R = 1$ . A: Difference in action value estimates over trials in a collection of individual simulations. B: Means and standard deviations of difference in action value estimates across 8 simulations. C: Percent of trials on which the  $L$  action with higher reward probability was selected.

196 also partitioned into action channels, with an eventual action selection triggered by the thalamic  
 197 firing rate in one channel reaching 30 Hz (Figure 1, center and Figure 7). We found that both dMSN  
 198 and iMSN firing rates gradually increased in response to cortical inputs. Consistent with our STDP  
 199 simulations (Figure 4), dMSN firing rates became higher in the channel for the selected action.  
 200 Interestingly, iMSN firing rates also became higher in the selected channel, consistent with recent  
 201 experiments (see Parker et al. (2018), among others). Similar to the activity patterns observed in  
 202 the striatum, higher firing rates were also observed in the selected channel's STN and thalamic  
 203 populations, whereas GPe and GPi firing rates were higher in the unselected channel (Figure 7).

204 More generally across all weight ratio conditions, dMSNs and iMSNs exhibited a gradual ramping  
 205 in population firing rates (Yartsev et al., 2018) that eventually saturated around the average RT  
 206 in each condition (Figure 8A). To characterize the relevant dimensions of striatal activity that  
 207 contributed to the network's behavior, we extracted several summary measures of dMSN and  
 208 iMSN activity, shown in Figure 8B-C. Summary measures of dMSN and iMSN activity in the  $L$  and  $R$   
 209 channels were calculated by estimating the area under the curve (AUC) of the population firing rate  
 210 between the time of stimulus onset (200 ms) and the RT on each trial. Trialwise AUC estimates were  
 211 then normalized between values of 0 and 1, including estimates from all trials in all conditions in  
 212 the normalization. As expected, increasing the disparity of left and right Ctx-dMSN weights led to  
 213 greater differences in direct pathway activation between the two channels (i.e.,  $D_L > D_R$ ; Figure 8B).  
 214 The increase in  $D_L - D_R$  reflects a form of competition between action channels, where larger values  
 215 indicate stronger dMSN activation in the optimal channel and/or a weakening of dMSN activity in  
 216 the suboptimal channel. Similarly, increasing the weight of Ctx-dMSN connections caused a shift in  
 217 the competition between dMSN and iMSN populations within the left action channel (i.e.,  $D_L > I_L$ ).  
 218 Thus, manipulating the weight of Ctx-dMSN connections to match those predicted by the STDP  
 219 model led to both between- and within-channel biases favoring firing of the direct pathway of the

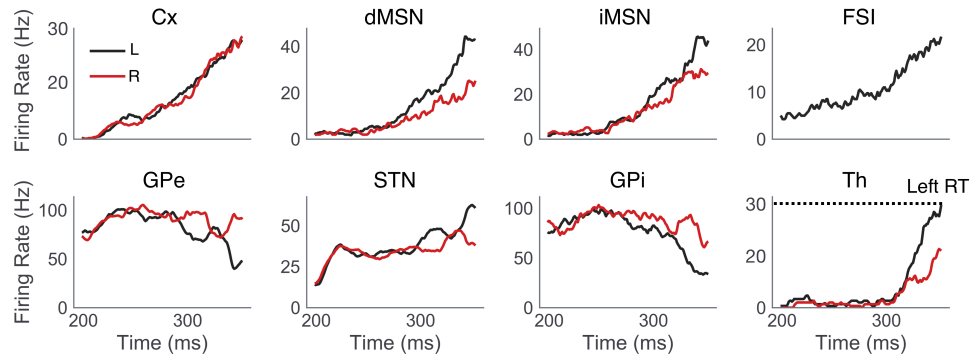

**Figure 7.** Single trial example of CBGT dynamics. Population firing rates of CBGT nuclei, computed as the average of individual unit firing rates within each nucleus in  $L$  (black) and  $R$  (red) action channels are shown for a single representative trial in the high reward probability condition. The selected action ( $L$ ) and corresponding RT (324 ms) are determined by the first action channel to raise its thalamic firing rate to 30 Hz.

220 optimal action channel in proportion to its expected reward value.

221 Interestingly, although the weights of Ctx-iMSN connections were kept constant across condi-  
222 tions, iMSN populations showed reliable differences in activation between channels (**Figure 8C**).  
223 Similar to the observed effects on direct pathway activation, higher reward conditions were asso-  
224 ciated with progressively greater differences in the AUC of  $L$  and  $R$  indirect pathway firing rates  
225 ( $I_L - I_R$ ). At first glance, greater indirect pathway activation in higher compared to lower valued  
226 action channels differs from the similarity of activation levels of both indirect pathway channels  
227 that we obtained in the STDP model and also appears to be at odds with canonical theories of the  
228 roles of the direct and indirect pathways in RL and decision-making. This finding can be explained,  
229 however, based on a certain feature represented in the connections within the CBGT network but  
230 not within the STDP network, namely thalamo-striatal feedback between channels. That is, the  
231 strengthening and weakening of Ctx-dMSN weights in the  $L$  and  $R$  channels, respectively, translated  
232 into relatively greater downstream disinhibition of the thalamus in the  $L$  channel, which increased  
233 excitatory feedback to  $L$ -dMSNs and  $L$ -iMSNs while reducing thalamo-striatal feedback to  $R$ -MSNs  
234 in both pathways.

235 Finally, we examined the effects of reward probability on the AUC of all iMSN firing rates ( $I_{all}$ ;  
236 combining across action channels). Observed differences in  $I_{all}$  across reward conditions were  
237 notably more subtle than those observed for other summary measures of striatal activity, with  
238 greatest activity in the medium reward condition, followed by the high and low reward conditions,  
239 respectively.

240 In addition to analyzing the effects of altered Ctx-dMSN connectivity strength on the functional  
241 dynamics of the CBGT network, we also studied how the decision-making behavior of the CBGT  
242 network was influenced by this manipulation. Consistent with previous studies of value-based  
243 decision-making in humans (*Manohar et al., 2015; Polanía et al., 2014; Afacan-Seref et al., 2018;*  
244 *Gardner et al., 2017; Jahfari et al., 2017*), we observed a positive effect of reward probability on both  
245 the frequency and speed of correct (e.g., leftward, associated with higher reward probability) choices  
246 (**Figure 8D**). Bootstrap sampling (10,000 samples) was performed to estimate 95% confidence  
247 intervals ( $CI_{95}$ ) around RT and accuracy means ( $\mu$ ) in each condition, and to assess the statistical  
248 significance of pairwise comparisons between conditions. Choice accuracy increased across low  
249 ( $\mu = 64\%$ ,  $CI_{95} = [62, 65]$ ), medium ( $\mu = 85\%$ ,  $CI_{95} = [84, 86]$ ), and high ( $\mu = 100\%$ ,  $CI_{95} = [100, 100]$ )  
250 reward probabilities. Pairwise comparisons revealed that the increase in accuracy observed between  
251 low and medium conditions, as well as that observed between medium and high conditions,  
252 reached statistical significance (both  $p < 0.0001$ ). Along with the increase in accuracy across



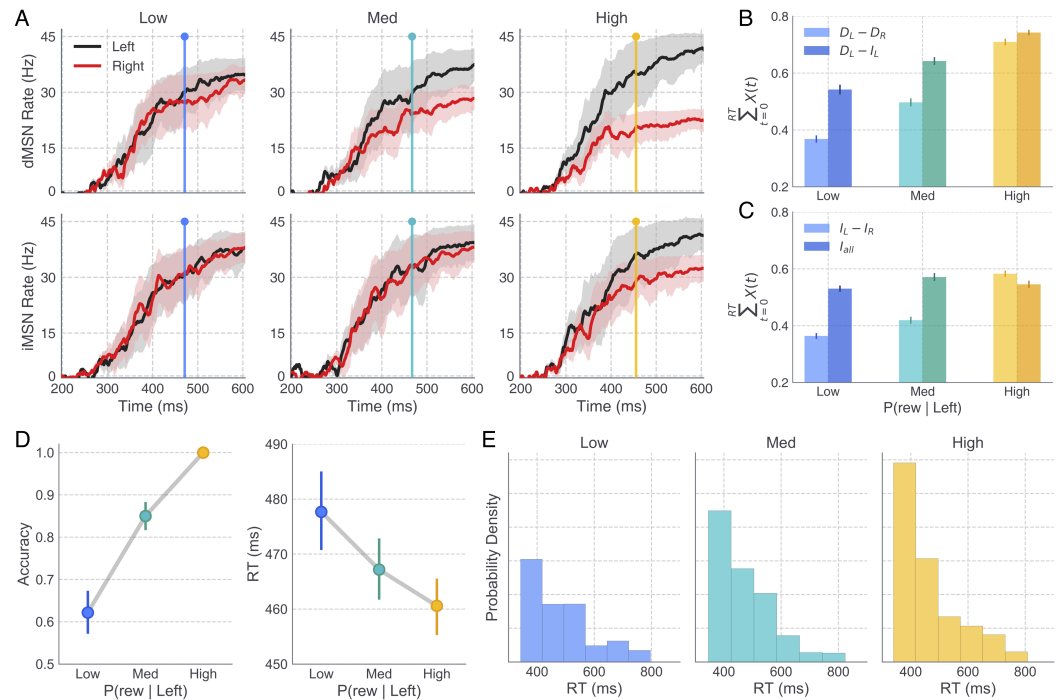

**Figure 8.** Striatal pathway dynamics and behavioral effects of reward probability in full CBGT network. A: Time courses show the average population firing rates for *L* (black) and *R* (red) dMSNs (top) and iMSNs (bottom) over the the trial window. Shaded areas reflect 95% CI. Colored vertical lines depict the average RT in the low (blue), medium (cyan), and high (yellow) reward conditions. B and C: Summary statistics of dMSN and iMSN population firing rates were extracted on each trial and later included as trial-wise regressors on parameters of the DDM, allowing specific hypotheses to be tested about the mapping between neural and cognitive mechanisms. In B, lighter colored bars show the difference between dMSN firing rates in the *L* and *R* action channels whereas darker colored bars show the difference between dMSN and iMSN firing rates in the *L* action channel, both computed by summing the average firing rate of each population between trial onset and the RT on each trial. In C, lighter colored bars show the difference between iMSN firing rates in the *L* and *R* action channels and darker colored bars show the average iMSN firing rate (combined across left and right channels). Error bars show the bootstrapped 95% CI. D: Average accuracy (probability of choosing *L*) and RT (*L* choices only) of CBGT choices across levels of reward probability. E: RT distributions for correct choices across levels of reward probability; note that higher reward yields more correct trials. Error bars in B-D show the bootstrapped 95% CI.

253 conditions, we observed a concurrent decrease in the RT of correct (*L*) choices in the low ( $\mu =$   
 254 477ms,  $CI_{95} = [472, 483]$ ), medium ( $\mu = 467$ ms,  $CI_{95} = [462, 471]$ ), and high ( $\mu = 460$ ms,  $CI_{95} = [456, 464]$ )  
 255 reward probability conditions. Notably, our manipulation of Ctx-dMSN weights across conditions  
 256 manifested in stronger effects on accuracy (i.e., probability of choosing the more valuable action),  
 257 with subtler effects on RT. Specifically, the decrease in RT observed between the low and medium  
 258 conditions reached statistical significance ( $p < .0001$ ); however, the RT decrease observed between  
 259 the medium and high conditions did not ( $p = .13$ ).

260 We also examined the distribution of RTs for *L* responses across reward conditions (Figure 8E).  
 261 All conditions showed a rightward skew in the distribution of RTs, an empirical hallmark of simple  
 262 choice behavior and a useful check of the suitability of accumulation-to-bound models like the DDM  
 263 for modeling a particular behavioral data set. Moreover, the degree of skew in the RT distributions  
 264 for *L* responses became more pronounced with increasing reward probability, suggesting that the  
 265 observed decrease in the mean RT at higher levels of reward was driven by a change in the shape  
 266 of the distribution, and not, for instance, a temporal shift in its location.

## 267 CBGT-DDM Mapping

268 We performed fits of a normative DDM to the CBGT network's decision-making performance (i.e.,  
269 accuracy and RT data) to understand the effects of corticostriatal plasticity on emergent changes  
270 in decision behavior. This process was implemented in three stages. First, we compared models  
271 in which only one free DDM parameter was allowed to vary across levels of reward probability  
272 (single parameter DDMs). Next, a second round of fits was performed in which a second free  
273 DDM parameter was included in the best-fitting single parameter model identified in the previous  
274 stage (dual parameter DDMs). Finally, the two best-fitting dual parameter models were submitted  
275 to a third and final round of fits with the inclusion of trialwise measures of striatal activity (see  
276 **Figure 8B-C**) as regressors on designated parameters of the DDM.

277 All models were evaluated according to their relative improvement in performance compared  
278 to a null model in which all parameters were fixed across conditions. To identify which single  
279 parameter of the DDM best captured the behavioral effects of alterations in reward probability as  
280 represented by Ctx-dMSN connectivity strength, we compared the deviance information criterion  
281 (DIC) of models in which either the boundary height ( $a$ ), the onset delay ( $tr$ ), the drift rate ( $v$ ), or  
282 the starting-point bias ( $z$ ) was allowed to vary across conditions. **Figure 9A** shows the difference  
283 between the DIC score of each model ( $DIC_M$ ) and that of the null model ( $\Delta DIC = DIC_M - DIC_{null}$ ), with  
284 lower values indicating a better fit to the data (see **Table 1** for additional fit statistics). Conventionally,  
285 a DIC difference ( $\Delta DIC$ ) of magnitude 10 or more is regarded as strong evidence in favor of the  
286 model with the lower DIC value (**Burnham and Anderson, 1998**). Compared to the null model as well  
287 as alternative single parameter models, allowing the drift rate  $v$  to vary across conditions afforded  
288 a significantly better fit to the data ( $\Delta DIC = -960.79$ ). Examination of posterior distributions of  $v$  in  
289 the best-fitting single parameter model revealed a significant increase in  $v$  with successively higher  
290 levels of reward probability ( $v_{Low} = .35$ ;  $v_{Med} = 1.61$ ;  $v_{High} = 2.71$ ), capturing the observed increase  
291 in speed and accuracy across conditions by increasing the rate of evidence accumulation toward  
292 the upper ( $L$ ) decision threshold.

293 To investigate potential interactions between the drift rate and other parameters of the DDM,  
294 we performed another round of fits in which a second free parameter (either  $a$ ,  $tr$ , or  $z$ ), in addition  
295 to  $v$ , was allowed to vary across conditions (**Figure 9A**). Compared to alternative dual-parameter  
296 models, the combined effect of allowing  $v$  and  $a$  to vary across conditions (Fig. **Figure 8B,C**) provided  
297 the greatest improvement in model fit over the null model ( $\Delta DIC = -1174.07$ ), as well as over  
298 the best-fitting single parameter model ( $DIC_{v,a} - DIC_v = -213.27$ ). While the dual  $v$  and  $a$  model  
299 significantly outperformed both alternatives ( $DIC_{v,a} - DIC_{v,t} = -205.89$ ;  $DIC_{v,a} - DIC_{v,z} = -184.05$ ),  
300 the second best-fitting dual parameter model, in which  $v$  and  $z$  were left free across conditions,  
301 also afforded a significant improvement over the drift-only model ( $DIC_{v,z} - DIC_v = -29.23$ ). Thus,  
302 both  $v, a$  and  $v, z$  dual parameter models were considered in a third and final round of fits. The  
303 third round was motivated by the fact that, while behavioral fits can yield reliable and informative  
304 insights about the cognitive mechanisms engaged by a given experimental manipulation, recent  
305 studies have effectively combined behavioral observations with coincident measures of neural  
306 activity to test more precise hypotheses about the neural dynamics involved in regulating different  
307 cognitive mechanisms (**Herz et al., 2016, 2018; Frank et al., 2015**). To this end, we refit the  $v, a$  and  
308  $v, z$  models to the same simulated behavioral dataset (i.e., accuracy and RTs produced by the CBGT  
309 network) as in the previous rounds, with the addition of different trialwise measures of striatal  
310 activity included as regressors on one of the two free parameters in the DDM.

311 For each regression DDM (N=24 models, corresponding to 24 ways to map 2 of 6 striatal activity  
312 measures to the  $v, a$  and  $v, z$  models), one of the summary measures shown in **Figure 8B-C** was  
313 regressed on  $v$ , and another regressed on either  $a$  or  $z$ , with separate regression weights estimated  
314 for each level of reward probability. Model fit statistics are shown for each of the 24 regression  
315 models in **Table 2**, along with information about the neural regressors included in each model and  
316 their respective parameter dependencies. The relative goodness-of-fit afforded by all 24 regression

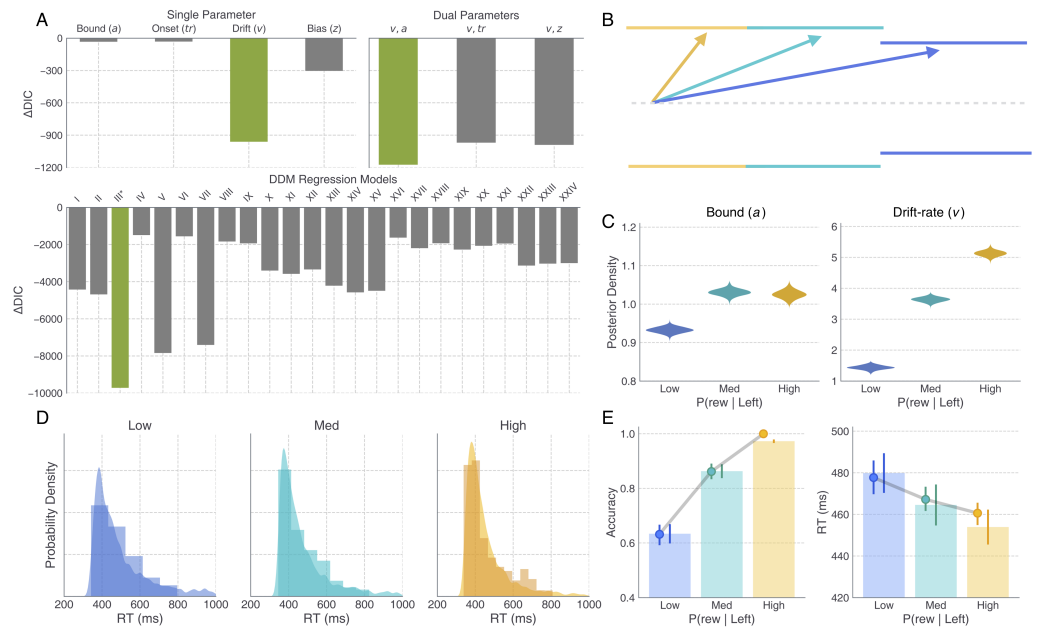

**Figure 9.** DDM fits to CBGT-simulated behavior reveals pathway-specific effects on drift rate and threshold mechanisms. A:  $\Delta$ DIC scores, showing the relative goodness-of-fit of all single- and dual-parameter DDMs considered (top) and all DDM regression models considered (bottom) compared to that of the null model (all parameters held constant across conditions; see **Table 2**). The  $\Delta$ DIC score of the best-fitting model at each stage is plotted in green. The best overall fit was provided by DDM regression model III. B: DDM schematic showing the change in  $v$  and  $a$  across low (blue), medium (cyan), and high (yellow) reward conditions, with the threshold for  $L$  and  $R$  represented as the upper and lower boundaries, respectively. C: Posterior distributions showing the estimated weights for neural regressors on  $a$ , which was estimated on each trial as a function of the average iMSN firing rate across left and right action channels (see  $I_{all}$  in **Figure 8C**), and  $v$ , which was estimated on each trial as a function of the the difference between dMSN firing rates in the left and right channels (see  $D_L - D_R$  in **Figure 8B**). D: Histograms and kernel density estimates showing the CBGT-simulated and DDM-predicted RT distributions, respectively. E: Point plots showing the CBGT network’s average accuracy and RT across reward conditions overlaid on bars showing the DDM-predicted averages.

317 models is visualized in **Figure 9A** (lower panel), identifying what we have labelled as model III as the  
 318 clear winner with an overall DIC =  $-18860.37$  and with  $\Delta$ DIC =  $-9716.17$  compared to the null model.  
 319 In model III, the drift rate  $v$  on each action selection trial depended on the relative strength of direct  
 320 pathway activation in  $L$  and  $R$  action channels (e.g.,  $D_L - D_R$ ), whereas the boundary height  $a$  on  
 321 that trial was computed as a function of the overall strength of indirect pathway activation across  
 322 both channels (e.g.,  $I_{all}$ ). To determine how these parameter dependencies influenced levels of  $v$   
 323 and  $a$  across levels of reward probability, the following equations were used to transform intercept  
 324 and regression coefficient posteriors into posterior estimates of  $v$  and  $a$  for each condition  $j$ :

$$v_j = \beta_0^v + \beta_j^v \Delta D_j, \quad (1)$$

$$a_j = \beta_0^a + \beta_j^a I_j, \quad (2)$$

325 where  $\Delta D_j$  and  $I_j$  are the mean values of  $D_L - D_R$  and  $I_{all}$  in condition  $j$  (see **Figure 8B-C**),  $\beta_0^v$  and  $\beta_0^a$   
 326 are posterior distributions for  $v$  and  $a$  intercept terms, and  $\beta_j^v$  and  $\beta_j^a$  are the posterior distributions  
 327 estimated for the linear weights relating  $D_L - D_R$  and  $I_{all}$  to  $v$  and  $a$ , respectively. The observed  
 328 effects of reward probability on  $v$  and  $a$ , as mediated by trialwise changes in  $D_L - D_R$  and  $I_{all}$ ,  
 329 are schematized in **Figure 9B**, with conditional posteriors for each parameter plotted in **Figure 9C**.  
 330 Consistent with best-fitting single and dual parameter models (e.g., without striatal regressors  
 331 included), the weighted effect of  $D_L - D_R$  on  $v$  in model III led to a significant increase in  $v$  across

332 low ( $\mu_{v_{Low}} = 1.43, \sigma_{v_{Low}} = .063$ ), medium ( $\mu_{v_{Med}} = 3.62, \sigma_{v_{Med}} = .078$ ), and high ( $\mu_{v_{High}} = 5.10, \sigma_{v_{High}} = .086$ )  
 333 conditions. Thus, increasing the disparity of dMSN activation between *L* and *R* action channels led to  
 334 faster and more frequent leftward actions by increasing the rate of evidence accumulation towards  
 335 the correct decision boundary. Also consistent with parameter estimates from the best-fitting dual  
 336 parameter model (i.e.,  $v, a$ ), inclusion of trialwise values of  $I_{all}$  led to an increase in the boundary  
 337 height in the medium ( $\mu_{a_{Med}} = 1.025, \sigma_{a_{Med}} = .009$ ) and high ( $\mu_{a_{High}} = 1.020, \sigma_{a_{High}} = .011$ ) conditions  
 338 compared to estimates in the low condition ( $\mu_{a_{Low}} = 0.93, \sigma_{a_{Low}} = .008$ ). However, in contrast with  
 339 boundary height estimates derived from behavioral data alone (not shown),  $a$  estimates in model III  
 340 showed no significant difference between medium and high levels of reward probability.

341 Next, we evaluated the extent to which the best-fitting regression model (i.e., model III) was able  
 342 to account for the qualitative behavioral patterns exhibited by the CBGT network in each condition.  
 343 To this end, we simulated 20,000 trials in each reward condition (each trial producing a response  
 344 and RT given a parameter set sampled from the model posteriors) and compared the resulting RT  
 345 distributions, along with mean speed and accuracy measures, with those produced by the CBGT  
 346 model (Figure 9D,E). Parameter estimates from the best-fitting model captured both the increasing  
 347 rightward skew of RT distributions, as well as the concurrent increase in mean decision speed and  
 348 accuracy with increasing reward probability.

349 In summary, by leveraging trialwise measures of simulated striatal MSN subpopulation dynamics  
 350 to supplement RT and choice data generated by the CBGT network, we were able to 1) substantially  
 351 improve the quality of DDM fits to the network's behavior across levels of reward probability  
 352 compared to models without access to neural observations and 2) identify dissociable neural signals  
 353 underlying observed changes in  $v$  and  $a$  across varying levels of reward probability associated with  
 354 available choices.

**Table 1.** Single- and dual-parameter DDM goodness-of-fit statistics. DIC is a complexity-penalized measure of model fit,  $DIC = D(\theta) + pD$ , where  $D(\theta)$  is the deviance of model fit under the optimized parameter set  $\theta$  and  $pD$  is the effective number of parameters.  $\Delta DIC$  is the difference between each model's DIC and that of the null model for which all parameters are fixed across conditions. Asterisks denote models providing best fits within the single-parameter group (\*) and across both groups (\*\*).

|                | DIC       | $\Delta DIC$ |
|----------------|-----------|--------------|
| Null           | -9144.21  | 0.0          |
| Bound ( $a$ )  | -9177.03  | -32.83       |
| Onset ( $tr$ ) | -9175.54  | -31.34       |
| Drift ( $v$ )* | -10105.0  | -960.79      |
| Bias ( $z$ )   | -9447.5   | -303.29      |
| $v, a$ **      | -10318.27 | -1174.07     |
| $v, tr$        | -10113.38 | -969.17      |
| $v, z$         | -10134.22 | -990.02      |

## 355 Discussion

356 Reinforcement learning in mammals alters the mapping from sensory evidence to action decisions.  
 357 Here we set out to understand how this adaptive decision-making process emerges from underlying  
 358 neural circuits using a modeling approach that bridges across levels of analysis, from plasticity at  
 359 corticostriatal synapses to CBGT network function to quantifiable behavioral parameters (Simen  
 360 et al., 2006; Ratcliff and Frank, 2012; Bogacz, 2007; Bogacz and Larsen, 2011). We show how a  
 361 simple, DA-mediated STDP rule can modulate the sensitivity of both dMSN and iMSN populations  
 362 to cortical inputs. This learning allows for the network to discover which target in a two-alternative  
 363 forced-choice task is more likely to deliver a reward by modifying the ratio of direct and indirect

**Table 2.** DDM regression models and goodness-of-fit statistics. Asterisk denotes best performing model.

|              | $D_L - D_R$ | $D_L - I_L$ | $I_L - I_R$ | $I_{all}$ | DIC       | $\Delta$ DIC |
|--------------|-------------|-------------|-------------|-----------|-----------|--------------|
| <b>I</b>     | <i>v</i>    | <i>a</i>    | -           | -         | -13567.84 | -4423.64     |
| <b>II</b>    | <i>v</i>    | -           | <i>a</i>    | -         | -13828.38 | -4684.17     |
| <b>*III</b>  | <i>v</i>    | -           | -           | <i>a</i>  | -18860.37 | -9716.16     |
| <b>IV</b>    | -           | <i>v</i>    | <i>a</i>    | -         | -10636.70 | -1492.50     |
| <b>V</b>     | -           | <i>v</i>    | -           | <i>a</i>  | -16982.35 | -7838.14     |
| <b>VI</b>    | <i>a</i>    | <i>v</i>    | -           | -         | -10702.48 | -1558.27     |
| <b>VII</b>   | -           | -           | <i>v</i>    | <i>a</i>  | -16547.47 | -7403.27     |
| <b>VIII</b>  | <i>a</i>    | -           | <i>v</i>    | -         | -10979.51 | -1835.31     |
| <b>IX</b>    | -           | <i>a</i>    | <i>v</i>    | -         | -11082.55 | -1938.34     |
| <b>X</b>     | <i>a</i>    | -           | -           | <i>v</i>  | -12546.90 | -3402.70     |
| <b>XI</b>    | -           | <i>a</i>    | -           | <i>v</i>  | -12719.92 | -3575.72     |
| <b>XII</b>   | -           | -           | <i>a</i>    | <i>v</i>  | -12486.66 | -3342.46     |
| <b>XIII</b>  | <i>v</i>    | <i>z</i>    | -           | -         | -13361.52 | -4217.32     |
| <b>XIV</b>   | <i>v</i>    | -           | <i>z</i>    | -         | -13719.36 | -4575.16     |
| <b>XV</b>    | <i>v</i>    | -           | -           | <i>z</i>  | -13634.12 | -4489.92     |
| <b>XVI</b>   | -           | <i>v</i>    | <i>z</i>    | -         | -10774.88 | -1630.67     |
| <b>XVII</b>  | -           | <i>v</i>    | -           | <i>z</i>  | -11340.47 | -2196.26     |
| <b>XVIII</b> | <i>z</i>    | <i>v</i>    | -           | -         | -11074.84 | -1930.64     |
| <b>XIX</b>   | -           | -           | <i>v</i>    | <i>z</i>  | -11418.76 | -2274.56     |
| <b>XX</b>    | <i>z</i>    | -           | <i>v</i>    | -         | -11213.79 | -2069.59     |
| <b>XXI</b>   | -           | <i>z</i>    | <i>v</i>    | -         | -11090.96 | -1946.75     |
| <b>XXII</b>  | <i>z</i>    | -           | -           | <i>v</i>  | -12279.57 | -3135.36     |
| <b>XXIII</b> | -           | <i>z</i>    | -           | <i>v</i>  | -12171.17 | -3026.96     |
| <b>XXIV</b>  | -           | -           | <i>z</i>    | <i>v</i>  | -12144.98 | -3000.77     |

364 pathway corticostriatal weights within each action channel. With this result in hand, we simulated  
 365 the network-level dynamics of CBGT circuits, as well as behavioral responses, under different levels  
 366 of conflict in reward probabilities, by extrapolating from the learned corticostriatal weights from the  
 367 STDP simulations. As reward probability for the optimal target increased, the asymmetry of dMSN  
 368 firing rates between action channels grew, as did the overall activity of iMSNs across both action  
 369 channels. By fitting the DDM to the simulated decision behavior of the CBGT network, we found  
 370 that changes in the rate of evidence accumulation tracked with the difference in dMSN population  
 371 firing rates across action channels, while the the level of evidence required to trigger a decision  
 372 tracked with the overall iMSN population activity. These findings show how, at least within this  
 373 specific framework, plasticity at corticostriatal synapses induced by phasic changes in DA can have  
 374 a multifaceted effect on cognitive decision processes.

375 A critical assumption of our theoretical experiments is that the CBGT pathways accumulate sen-  
 376 sory evidence for competing actions in order to identify the most contextually appropriate response.  
 377 This assumption is supported by a growing body of empirical and theoretical evidence. For example,  
 378 *Yartsev et al. (2018)* recently showed that, in rodents performing an auditory discrimination task,  
 379 the anterior dorsolateral striatum satisfied three fundamental criteria for establishing causality in  
 380 the evidence accumulation process: (1) inactivation of the striatum ablated the animal's discrimina-  
 381 tion performance on the task, (2) perturbation of striatal neurons during the temporal window of  
 382 evidence accumulation had predictable and reliable effects on trial-wise behavioral reports, and (3)  
 383 gradual ramping, proportional to the strength of evidence, was observed in both single unit and  
 384 population firing rates of the striatum (however, see also *Ding and Gold (2010)*). Consistent with  
 385 these empirical findings, *Caballero et al. (2018)* recently proposed a novel computational frame-

386 work, capturing perceptual evidence accumulation as an emergent effect of recurrent activation  
387 of competing action channels. This modeling work builds on previous studies showing how the  
388 architecture of CBGT loops is ideal for implementing a variant of the sequential probability ratio test  
389 (*Bogacz and Gurney, 2007; Bogacz, 2007*). Taken together, these converging lines of evidence point  
390 to CBGT pathways as being causally involved in the accumulation of evidence for decision-making.

391 The idea that an accumulation of evidence algorithm can be implemented via network-level  
392 dynamics within looped circuit architectures stands in sharp contrast to cortical models of decision-  
393 making that presume a more direct isomorphism between accumulators and neural activity (for  
394 review see *Gold and Shadlen (2007)*). Early experimental work showed how population-level firing  
395 rates in area LIP displayed the same ramp-to-threshold dynamics as predicted by an evidence  
396 accumulation process (*Shadlen and Newsome, 2001; Kiani and Shadlen, 2009; Churchland et al.,*  
397 *2008*). This simple relation between algorithm and implementation has now come into question.  
398 Follow-up electrophysiological experiments showed how this population-level accumulation may,  
399 in fact, reflect the aggregation of step-functions across neurons that resemble an accumulator  
400 when summed together yet lack accumulation properties at the level of individual units (*Latimer*  
401 *et al., 2015*). In addition, recent results from intervention studies are inconsistent with the causal  
402 role of cortical areas in the accumulation of evidence. For instance, *Katz et al. (2016)* found that  
403 inactivation of area LIP in macaques had no effect on the ability of monkeys to discriminate the  
404 direction of motion stimuli in a standard random dot motion task. In contrast to the presumed  
405 centrality of LIP in sensory evidence accumulation, these findings and supporting reports from  
406 *Licata et al. (2017)* and *Erlich et al. (2015)* suggest that cortical areas like LIP provide a useful proxy  
407 for the deliberation process but are unlikely to have a causal role in the decision itself.

408 The recent experimental (*Yartsev et al., 2018*) and theoretical (*Caballero et al., 2018*) revelations  
409 of CBGT involvement in decision-making are particularly exciting, not only for the purposes of  
410 identifying a likely neural substrate of perceptual choice, but also for their implications for inte-  
411 grating accumulation-to-bound models (e.g., action selection mechanisms) with theories of RL  
412 (e.g., feedback-dependent learning of action values). We previously proposed a Believer-Skeptic  
413 framework (*Dunovan and Verstynen, 2016*) to capture the complementary roles played by the  
414 direct and indirect pathways in the feedback-dependent learning and the moment-to-moment  
415 evidence accumulation leading up to action selection. This competition between opposing control  
416 pathways can be characterized as a debate between a Believer (direct pathway) and a Skeptic  
417 (indirect pathway), reflecting the instantaneous probability ratio of evidence in favor of executing  
418 and suppressing a given action respectively. Because the default state of the basal ganglia path-  
419 ways is motor-suppressing (e.g., *Alexander and Crutcher (1990); Wichmann and DeLong (1996)*),  
420 the burden of proof falls on the Believer to present sufficient evidence for selecting a particular  
421 action. In accumulation-to-bound models like the DDM, this sequential sampling of evidence is  
422 parameterized by the drift rate. Therefore, the Believer-Skeptic model specifically predicts that  
423 this competition should be reflected, at least in part, in the rate of evidence accumulation. As for  
424 the role of learning in the Believer-Skeptic competition, multiple lines of evidence suggest that  
425 dopaminergic feedback during learning systematically biases the direct-indirect competition in a  
426 manner consistent with increasing the drift rate for more rewarding actions (*Pedersen et al., 2017;*  
427 *Manohar et al., 2015; Collins and Frank, 2014; Dunovan and Verstynen, 2016; Frank et al., 2015;*  
428 *Afacan-Seref et al., 2018*). Indeed, the STDP simulations in the current study showed opposing  
429 effects of dopaminergic feedback on corticostriatal synapses in the direct pathway for both the  
430 optimal and suboptimal action channels, with the post-learning difference between the direct  
431 pathway synaptic weights in the two channels proportional to the difference in expected action  
432 values. This provides testable predictions at multiple levels for how feedback learning should  
433 influence the decision process over time.

434 In support of the biological assumptions underlying the CBGT network, several important  
435 empirical properties naturally emerged from our simulations. First, both dMSN and iMSN striatal  
436 populations were concurrently activated on each trial (see *Cui et al. (2015); Klaus et al. (2017);*

437 *Donahue et al. (2018)*) and exhibited gradually ramping firing rates that often saturated before  
438 the response on each trial (*Yartsev et al., 2018; Ding and Gold, 2010*). Second, in contrast with the  
439 relatively early onset of ramping activity in the striatum, recipient populations in the GPi sustained  
440 high tonic firing rates throughout most of the trial, with activity in the selected channel showing a  
441 precipitous decline near the recorded RT (*Schmidt et al., 2013; Lo and Wang, 2006; Wei et al., 2015*).  
442 This delayed change in GPi activation is likely due to the opposing influence of concurrently active  
443 dMSN and iMSN populations in each channel, such that the influence of the direct pathway on  
444 the GPi is temporarily balanced out by activation of the indirect pathway (see *Wei et al. (2015)*). To  
445 represent low, medium, and high levels of reward probability conflict, we manipulated the weights  
446 of cortical input to dMSNs in each channel (see *Table 4*), increasing and decreasing the ratio of  
447 direct pathway weights to indirect pathway weights for *L* and *R* actions, respectively. As expected,  
448 increasing the difference in the associated reward for *L* and *R* actions led to stronger firing in  
449 *L*-dMSNs and weaker firing of *R*-dMSNs. Consistent with recently reported electrophysiological  
450 findings (*Donahue et al., 2018; Klaus et al., 2017*), we also observed an increase in the firing of  
451 iMSNs in the *L* action channel, which in our simulations may arise from channel-specific feedback  
452 from the *L* component of the thalamus. Behaviorally, the choices of the CBGT network became  
453 both faster and more accurate (e.g., higher percentage of *L* responses) at higher levels of reward,  
454 suggesting that the observed increase in *L*-iMSN firing did not serve to delay or suppress *L*  
455 selections. These changes in neural dynamics also produced consequent changes in value-based  
456 decision behavior consistent with previous studies linking parameters of the DDM with experiential  
457 feedback .

458 One of the critical outcomes of the current set of experiments is the mechanistic prediction  
459 of how variation in specific neural parameters relates to changes in parameters of the DDM.  
460 Consistent with past work (see *Dunovan and Verstynen (2016); Frank et al. (2015)*), the DDM fits to  
461 the CBGT-simulated behavior showed an increase in drift rate toward the higher valued decision  
462 boundary with increasing expected reward. Additionally, we found that greater disparity in the  
463 expected values of alternative actions led to an increase in the boundary height. Indeed, the  
464 co-modulation of drift rate and boundary parameters observed here has also been found in  
465 human and animal experimental studies of value-based choice (*Afacan-Seref et al., 2018; Manohar  
466 et al., 2015; Frank et al., 2015*). For example, experiments with human subjects in a value-based  
467 learning task showed that selection and response speed patterns were best described by an  
468 increase in the rate of evidence for more valued targets, coupled with an upwards shift in the  
469 boundary height for all targets (*Manohar et al., 2015*). Moreover, in healthy human subjects,  
470 but not Parkinson's disease patients, reward feedback was found to drive increases in both rate  
471 and boundary height parameters, effectively breaking the speed-accuracy tradeoff (*Manohar et al.  
472 (2015)*). To identify more precise links between the relevant neural dynamics underlying the observed  
473 drift rate and boundary height effects we performed another round of model fits with striatal  
474 summary measures included as regressors to describe trial-by-trial variability. Behavioral fits were  
475 substantially improved by estimating trialwise values of drift rate as a function of the difference  
476 between *L*- and *R*-dMSN activation and trialwise values of boundary height as a function of the  
477 iMSN activation across both channels. These relationships stand both as novel predictions arising  
478 from the current study and as refinements to the Believer-Skeptic framework, implying that the  
479 Believer component relies on a competition between action channels while the Skeptic involves a  
480 cooperative aspect.

481 While our present findings provide key insights into the links between implementation mecha-  
482 nisms and cognitive algorithms during adaptive decision-making, they are constrained by the nature  
483 of the multi-level modeling approach itself. When considering the potential benefits of multi-level  
484 modeling to investigations mapping across levels of analysis, it is important to understand the kinds  
485 of questions that this approach is poised to address as well as some of its limitations. For instance,  
486 because the CBGT network is substantially more complex (i.e., has more parameters) than the  
487 DDM, it is necessarily more flexible in terms of the empirical phenomena that it is capable of fitting,

488 Thus, given this disparity in the degrees of freedom at the neural and cognitive levels, it becomes  
489 exceedingly likely that multiple parameter mappings exist between them. That is, many different  
490 properties of the CBGT network, aside from corticostriatal weights and measures of striatal activity,  
491 could potentially be manipulated to cause analogous behavioral patterns and inferred effects on  
492 the drift rate and boundary height parameters in the DDM. Importantly, our goal in using multi-level  
493 modeling was not to arbitrate between alternative, mutually exclusive biological implementations  
494 of a given parameter that appears at the cognitive level, but rather to understand how specific  
495 neural features related to the Believer-Skeptic framework contribute to cognitive computations by  
496 examining which parameters they influence when perturbed. We do not presume that the impacts  
497 of dopaminergic plasticity at corticostriatal synapses on striatal activity are singularly responsible  
498 for setting the drift rate during value-based decision-making, for example. Rather, our simulations  
499 demonstrate that strengthening corticostriatal synapses is one way that the brain can adjust striatal  
500 firing to shape the drift rate and accumulation threshold, promoting faster and more frequent  
501 selection of actions with a higher expected value.

502 Our simulations make several novel predictions for future experiments. The STDP simulations  
503 described in the *STDP network results* section suggest that feedback-dependent reward learning  
504 should drive more salient changes in cortical synaptic weights to dMSN populations than to iMSN  
505 populations. At the same time, while the learning-related changes in  $L$  and  $R$  direct pathway  
506 corticostriatal weights were mirrored by the relative firing rates of  $L$ - and  $R$ -dMSNs in the CBGT  
507 network, iMSN firing rates are also predicted to show channel-specific differences, despite constancy  
508 in their corticostriatal weights across conditions. The observed increase in iMSN firing disparity  
509 between the  $L$  and  $R$  channels in our simulations emerged due to the thalamostriatal feedback  
510 assumed in the CBGT network, where dMSN activation leads to disinhibition of the thalamus,  
511 thereby increasing excitatory feedback to both MSN subtypes within a given channel. This represents  
512 another novel model prediction that can be tested empirically. Since it is currently unclear whether  
513 these feedback connections actually adhere to a channel-specific (e.g., focal) topology, we hope that  
514 our work will motivate future experiments to explore the topology of thalamostriatal inputs. Finally,  
515 our study predicts that the difference in dMSN activity across action channels modulates the rate of  
516 value-based evidence accumulation. This could be directly tested by applying different magnitudes  
517 of optogenetic stimulation to dMSNs in  $L$ - and  $R$ -lateralized dorsolateral striatum to effectively  
518 manipulate the strength of evidence for  $L$  and  $R$  lever presses. According to our simulations,  
519 increasing the relative magnitude of dMSN stimulation in the  $R$ , compared to  $L$ , dorsolateral  
520 striatum should speed and facilitate the selection of contralateral lever presses. Choice and RT  
521 data could then be fit with the DDM to determine if the behavioral effects of laterally-biased dMSN  
522 stimulation were best described by a change in the drift rate. Analogous experiments targeting  
523 iMSNs but without channel specificity could be used similarly to evaluate our prediction that overall  
524 iMSN activity level modulates DDM boundary height.

## 525 Conclusion

526 Here we characterize the effects of dopaminergic feedback on the competition between direct and  
527 indirect CBGT pathways and how this plasticity impacts the evaluation of evidence for alternative  
528 actions during value-based choice. Using simulated neural dynamics to generate behavioral data  
529 for fitting by the DDM and determining how measures of striatal activity influence this fit, we show  
530 how the rate of evidence accumulation and the decision boundary height are modulated by the  
531 direct and indirect pathways, respectively. This multi-level modeling approach affords a unique  
532 combination of biological plausibility and mechanistic interpretability, providing a rich set of testable  
533 predictions for guiding future experimental work at multiple levels of analysis.

## 534 Methods

535 Our work involves three distinct model systems, a *spike-timing dependent plasticity (STDP)* network  
536 consisting of striatal neurons and their cortical inputs, with corticostriatal synaptic plasticity driven



537 by phasic reward signals resulting from simulated actions and their consequent dopamine release; a  
 538 spiking *cortico-basal ganglia-thalamic (CBGT)* network, comprising neurons and synaptic connections  
 539 from the key cortical and subcortical areas within the CBGT computational loops that take sensory  
 540 evidence from cortex and make a decision to select one of two available responses; and the *drift*  
 541 *diffusion model (DDM)*, a cognitive model of decision-making that describes the accumulation-to-  
 542 bound dynamics underlying the speed and accuracy of simple choice behavior (**Ratcliff, 1978**).

543 In this section, we present the details of each of these models along with some computational  
 544 approaches that we use in simulating and analyzing them. The three models are simulated sep-  
 545 arately, but outputs of specific models are critical for the tuning of other models, as we shall  
 546 describe.

## 547 **STDP network**

### 548 **Neural model**

549 We consider a computational model of the striatum consisting of two different populations that  
 550 receive different inputs from the cortex (see **Figure 1**, left). Although they do not interact directly,  
 551 they compete with each other to be the first to select a corresponding action.

552 Each population contains two different types of units: (i) dMSNs, which facilitate action selection,  
 553 and (ii) iMSNs, which suppress action selection. Each of these neurons is represented with the expo-  
 554 nential integrate-and-fire model (**Fourcaud-Trocmé et al., 2003**), such that each neural membrane  
 555 potential obeys the differential equation

$$C \frac{dV}{dt} = -g_L(V - V_L) + g_L \Delta_T e^{(V - V_T)/\Delta_T} - I_{syn}(t) \quad (3)$$

556 where  $g_L$  is the leak conductance and  $V_L$  the leak reversal potential. In terms of a neural  $I - V$   
 557 curve,  $V_T$  denotes the voltage that corresponds to the largest input current to which the neuron  
 558 does not spike in the absence of synaptic input, while  $\Delta_T$  stands for the spike slope factor, related  
 559 to the sharpness of spike initialization.  $I_{syn}(t)$  is the synaptic current, given by  $I_{syn}(t) = g_{syn}(t)(V(t) -$   
 560  $V_{syn})$ , where the synaptic conductance  $g_{syn}(t)$  changes via a learning procedure (see *Learning rule*  
 561 subsection). A reset mechanism is imposed that represents the repolarization of the membrane  
 562 potential after each spike. Hence, when the neuron reaches a boundary value  $V_b$ , the membrane  
 563 potential is reset to  $V_r$ .

564 The inputs from the cortex to each MSN neuron within a population are generated using a  
 565 collection of oscillatory Poisson processes with rate  $\nu$  and pairwise correlation  $c$ . Each of these  
 566 cortical spike trains, which we refer to as daughters, is generated from a baseline oscillatory Poisson  
 567 process  $\{X(t_n)\}_n$ , the mother train, which has intensity function  $\lambda(1 + A \sin(2\pi\theta t))$  such that the spike  
 568 probability at time point  $t_n$  is

$$P(X(t_n) = 1) \propto \int_{t_{n-1}}^{t_n} \lambda(1 + A \sin(2\pi\theta t)) dt,$$

569 where  $A$  and  $\theta$  are the amplitude and the frequency of the underlying oscillation, respectively;  
 570  $t_{n+1} - t_n =: \delta t$  is the time step; and  $\lambda$  is the mother train rate. After the mother train is computed,  
 571 each mother spike is transferred to each daughter with probability  $p$ , checked independently for  
 572 each daughter. To fix the daughters' rates and the correlation between the daughter trains, the  
 573 mother train's rate is given by  $\lambda = \nu / (p * \delta t)$  where

$$p = \nu + c(1 - \nu). \quad (4)$$

574 In the STDP network (see **Figure 1**, left) we consider two different mother trains to generate  
 575 the cortical daughter spike trains for the two different MSN populations. Each dMSN neuron  
 576 or iMSN neuron receives input from a distinct daughter train, with the corresponding transfer  
 577 probabilities  $p^D$  and  $p^I$ , respectively. As shown in **Kreitzer and Malenka (2008)**, the cortex to iMSN  
 578 release probability exceeds that of cortex to dMSN. Hence, we set  $p^D < p^I$ .

579 Striatal neuron parameters.

580 We set the exponential integrate-and-fire model parameter values as  $C = 1 \mu F/cm^2$ ,  $g_L = 0.1 \mu S/cm^2$ ,  
 581  $V_L = -65 mV$ ,  $V_T = -59.9 mV$ , and  $\Delta_T = 3.48 mV$  (see *Fourcaud-Trocmé et al. (2003)*). The reset  
 582 parameter values are  $V_b = -40 mV$  and  $V_r = -75 mV$ . The synaptic current derives entirely from  
 583 excitatory inputs from the cortex, so  $V_{syn} = 0 mV$ . For these specific parameters, synaptic inputs are  
 584 required for MSN spiking to occur.

585 Cortical neuron parameters.

586 To compute  $p$ , we set the daughter Poisson process parameter values as  $\nu = 0.002$  and  $c = 0.5$  and  
 587 apply *Equation 4*. Once the mother trains are created using these values, we set the iMSN transfer  
 588 probability to  $p^I = p$  and the dMSN transfer probability to  $p^D = 2/3 p^I$ . In most simulations, we  
 589 set  $A = 0$  to consider non-oscillatory cortical activity. We have also tested the learning rule when  
 590  $A = 0.06$  and  $\theta = 25 Hz$  and obtained similar results.

591 The network has been integrated computationally by using the Runge-Kutta (4,5) method in  
 592 Matlab (ode45) with time step  $\delta t = 0.01 ms$ . Different realizations lasting  $15 s$  were computed to  
 593 simulate variability across different subjects in a learning scenario.

594 Every time that an action is performed (see *Action and rewards* and *Example implementation*  
 595 subsections), all populations stop receiving inputs from the cortex until all neurons in the network  
 596 are in the resting state for at least  $50 ms$ . During these silent periods, no MSN spikes occur and  
 597 hence no new actions are performed (i.e., they are action refractory periods). After these  $50 ms$ , the  
 598 network starts receiving synaptic inputs again and we consider a new trial to be underway.

599 Learning rule

600 During the learning process, the corticostriatal connections are strengthened or weakened accord-  
 601 ing to previous experiences. In this subsection, we will present equations for a variety of quantities,  
 602 many of which appear multiple times in the model. Specifically, there are variables  $g_{syn}$ ,  $w$  for each  
 603 corticostriatal synapse,  $A_{PRE}$  for each daughter train,  $A_{POST}$  and  $E$  for each MSN. For all of these,  
 604 to avoid clutter, we omit subscripts that would indicate explicitly that there are many instances of  
 605 these variables in the model.

606 We suppose that the conductance for each corticostriatal synapse onto each MSN neuron,  $g_{syn}(t)$ ,  
 607 obeys the differential equation

$$\frac{dg_{syn}}{dt} = \sum_j w(t_j) \delta(t - t_j) - g_{syn} / \tau_g, \quad (5)$$

608 where  $t_j$  denotes the time of the  $j$ th spike in the cortical daughter spike train pre-synaptic to the  
 609 neuron,  $\delta(t)$  is the Dirac delta function,  $\tau_g$  stands for the decay time constant of the conductance,  
 610 and  $w(t)$  is a weight associated with that train at time  $t$ . The weight is updated by dopamine  
 611 release and by the neuron's role in action selection based on a similar formulation to one proposed  
 612 previously (*Baladron et al., 2017*), which descends from earlier work (*Izhikevich, 2007*). The idea of  
 613 this plasticity scheme is that an eligibility trace  $E$  (cf. *Shindou et al. (2018)*) represents a neuron's  
 614 recent spiking history and hence its eligibility to have its synapses modified, with changes in eligibility  
 615 following a spike timing-dependent plasticity (STDP) rule that depends on both the pre- and the  
 616 post-synaptic firing times. Plasticity of corticostriatal synaptic weights depends on this eligibility  
 617 together with dopamine levels, which in turn depend on the reward consequences that follow  
 618 neuronal spiking.

619 To describe the evolution of neuronal eligibility, we first define  $A_{PRE}$  and  $A_{POST}$  to represent  
 620 a record of pre- and post-synaptic spiking, respectively. Every time that a spike from the corre-  
 621 sponding cell occurs, the associated variable increases by a fixed amount, and otherwise, it decays  
 622 exponentially. That is,

$$\begin{aligned} \frac{dA_{PRE}}{dt} &= (\Delta_{PRE} X_{PRE}(t) - A_{PRE}(t)) / \tau_{PRE}, \\ \frac{dA_{POST}}{dt} &= (\Delta_{POST} X_{POST}(t) - A_{POST}(t)) / \tau_{POST}, \end{aligned} \quad (6)$$

623 where  $X_{PRE}(t)$  and  $X_{POST}(t)$  are functions set to 1 at times  $t$  when, respectively, a neuron that is  
 624 pre-synaptic to the post-synaptic neuron, or the post-synaptic neuron itself, fires a spike, and  
 625 are zero otherwise, while  $\Delta_{PRE}$  and  $\Delta_{POST}$  are the fixed increments to  $A_{PRE}$  and  $A_{POST}$  due to this  
 626 firing. The additional parameters  $\tau_{PRE}, \tau_{POST}$  denote the decay time constants for  $A_{PRE}, A_{POST}$ ,  
 627 respectively.

628 The spike time indicators  $X_{PRE}, X_{POST}$  and the variables  $A_{PRE}, A_{POST}$  are used to implement an  
 629 STDP-based evolution equation for the eligibility trace, which takes the form

$$\frac{dE}{dt} = (X_{POST}(t)A_{PRE}(t) - X_{PRE}(t)A_{POST}(t) - E) / \tau_E \quad (7)$$

630 implying that if a pre-synaptic neuron spikes and then its post-synaptic target follows, such that  
 631  $A_{PRE} > 0$  and  $X_{POST}$  becomes 1, the eligibility  $E$  increases, while if a post-synaptic spike occurs  
 632 followed by a pre-synaptic spike, such that  $A_{POST} > 0$  and  $X_{PRE}$  becomes 1, then  $E$  decreases; at  
 633 times without spikes, the eligibility decays exponentially with rate  $\tau_E$ .

634 In contrast to previous work (*Baladron et al., 2017*), we propose an update scheme for the  
 635 synaptic weight  $w(t)$  that depends on the type of MSN neuron involved in the synapse. It has been  
 636 observed (*Dreyer et al., 2010; Richfield et al., 1989; Gonon, 1997; Keeler et al., 2014*) that dMSNs  
 637 tend to have less activity than iMSNs at resting states, consistent with our assumption that  $p^D < p^I$ ,  
 638 and are more responsive to phasic changes in dopamine than iMSNs. In contrast, iMSNs are largely  
 639 saturated by tonic dopamine. In both cases, we assume that the eligibility trace modulates the  
 640 extent to which a synapse can be modified by the dopamine level relative to a tonic baseline (which  
 641 we without loss of generality take to be 0), consistent with previous models. Hence, we take  $w(t)$  to  
 642 change according to the equation

$$\frac{dw}{dt} = \alpha_w E f(K_{DA})(w_{max}^X - w), \quad (8)$$

643 where the function

$$f(K_{DA}) = \begin{cases} K_{DA}, & \text{if the target neuron is a dMSN,} \\ \frac{K_{DA}}{c + |K_{DA}|}, & \text{if the target neuron is an iMSN} \end{cases}$$

644 represents sensitivity to phasic dopamine,  $\alpha_w$  refers to the learning rate,  $K_{DA}$  denotes the level of  
 645 dopamine available at the synapses,  $w_{max}^X$  is an upper bound for the weight  $w$  that depends on  
 646 whether the postsynaptic neuron is a dMSN ( $X = D$ ) or an iMSN ( $X = I$ ),  $c$  controls the saturation  
 647 of weights to iMSNs, and  $|\cdot|$  denotes the absolute value function. The dopamine level  $K_{DA}$  itself  
 648 evolves as

$$\frac{dK_{DA}}{dt} = \sum_i (DA_{inc}(t_i) - K_{DA})\delta(t_i) - K_{DA}/\tau_{DOP}, \quad (9)$$

649 where the sum is taken over the times  $\{t_i\}$  when actions are performed, leading to a change in  $K_{DA}$   
 650 that we treat as instantaneous, and  $\tau_{DOP}$  is the dopamine decay constant. The DA update value  
 651  $DA_{inc}(t_i)$  depends on the performed action as follows:

$$\begin{aligned} DA_{inc}(t) &= r_i(t) - \max_i \{Q_i(t)\}, \\ Q_i(t+1) &= Q_i(t) + \alpha (r_i(t) - Q_i(t)), \end{aligned} \quad (10)$$

652 where  $r_i(t)$  is the reward associated to action  $i$  at time  $t$ ,  $Q_i(t)$  is an estimate of the value of action  $i$  at  
 653 time  $t$  such that  $r_i(t) - Q_i(t)$  is the subtractive reward prediction error (*Eshel et al., 2015*), and  $\alpha \in [0, 1]$   
 654 is the value learning rate. This rule for action value updates and dopamine release resembles past  
 655 work (*Mikhael and Bogacz, 2016*) but uses a neurally tractable maximization operation (see *Roesch*  
 656 *et al. (2007); Kozlov and Gentner (2013)* and references therein) to take into account that reward  
 657 expectations may be measured relative to optimal past rewards obtained in similar scenarios  
 658 (*Cohen et al., 2012; Morris et al., 2006*). The evolution of these variables is illustrated in *Figure 10*,  
 659 which is discussed in more detail in the *Example implementation* subsection.

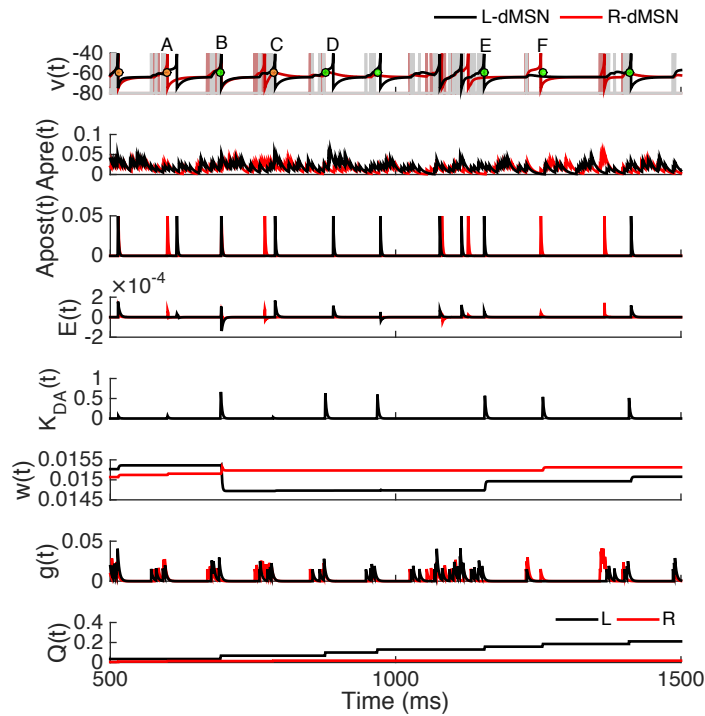

**Figure 10.** Evolution of the learning rule variables for particular dMSNs, one promoting the  $L$  action (black, actual reward value 0.7) and one promoting the  $R$  action (red, actual reward value 0.1). Each panel represents corresponding variables for both neurons except  $K_{DA}(t)$ , which is common across all neurons. For each example neuron, the top panel shows its membrane potential (dark trace) and the cortical spike trains it receives (light trace with many spikes). This panel also represents the action onset times: green and orange dots if actions  $L$  and  $R$  occur, respectively. Different example cases labeled with letters (A,B,C,D,E,F) are described in the text in the *Example implementation* subsection.

## 660 Actions and rewards

### 661 Actions

662 Each dMSN facilitates performance of a specific action. We specify that an action occurs, and so a  
 663 decision is made by the model, when at least three different dMSNs of the same population spike  
 664 in a small time window of duration  $\Delta_{DA}$ . When this condition occurs, a reward is delivered and the  
 665 dopamine level is updated correspondingly, impacting all neurons in the network, depending on  
 666 eligibility. Then, the spike counting and the initial window time are reset, and cortical spikes to all  
 667 neurons are turned off over the next 50 ms before resuming again as usual.

668 We assume that iMSN activity within a population counters the performance of the action  
 669 associated with that population. We implement this effect by specifying that when an iMSN in a  
 670 population fires, the most recent spike fired by a dMSN in that population is suppressed. Note that  
 671 this rule need not contradict observed activation of both dMSNs and iMSNs preceding a decision  
 672 (Cui et al., 2013), see *Results* section. We also implemented a version of the network in which each  
 673 iMSN spike cancels the previous spike from both MSN populations. Preliminary simulations of this  
 674 variant gave similar results to our primary version but with slower convergence (data not shown).

675 For convenience, we refer to the action implemented by one population of neurons as “left” or  
 676  $L$  and the action selected by the other population as “right” or  $R$ .

### 677 Rewards

678 In our simulations, to test the learning rule, we present results from different reward scenarios.  
 679 In one case, we use constant rewards, with  $r_L = 0.7$  and  $r_R = 0.1$ . In another case, we implement

680 probabilistic rewards: every time that an action occurs, the reward  $r_i$  is set to be 1 with probability  
681  $p_i$  or 0 otherwise,  $i \in \{L, R\}$ . For this case, we consider three different probabilities such that  
682  $p_L + p_R = 1$  and  $p_L > p_R$ , keeping the action  $L$  as the preferred one. Specifically, we take  $p_L = 0.85$ ,  
683  $p_L = 0.75$ , and  $p_L = 0.65$  to allow comparison with previous results (*Frank et al., 2015*). In tuning the  
684 model, we also considered a regime with reward switches: reward values were as in the constant  
685 reward case but after a certain number of actions occurred, the reward-action associations were  
686 exchanged. Although the model gave sensible results, we did not explore this case thoroughly, and  
687 we simply show one example in *Appendix 1*.

### 688 Example implementation

689 The algorithm for the learning rule simulations is as follows:

690 First, compute cortical mother spike trains and extract daughter trains to be used as inputs to  
691 each MSN from the mother trains.

692 Next, while  $t < t_{end}$ ,

- 693 1. use RK45, with step size  $dt = 0.01$  ms, to compute the voltages of the MSNs in the network at  
694 the current time  $t$  from *Equation 3* and *Equation 5*,
- 695 2. for each MSN, set the corresponding  $X_{POST}(t)$  equal to 1 if a spike is performed or 0 otherwise  
696 and set the corresponding  $X_{PRE}(t)$  to 1 if an input spike arrives or 0 otherwise,
- 697 3. update the *action* condition by checking sequentially for the following two events:
  - 698 • if any iMSN neuron in population  $i \in \{L, R\}$  spikes, then the most recent spike performed  
699 by any of the dMSNs of population  $i$  is cancelled;
  - 700 • for each  $i \in \{L, R\}$ , count the number of spikes of the dMSNs in the  $i$ th population inside  
701 a time window consisting of the last  $\Delta_{DA}$  ms; if at least  $n_{act}$  spikes have occurred in this  
702 window, then action  $i$  has occurred and we update  $DA_{inc}$  and  $Q_i$  according to *Equation 10*,
- 703 4. use RK45, with step size  $dt = 0.01$  ms, to solve *Equation 6-Equation 8* for each synapse, along  
704 with *Equation 9*, yielding an update of DA and synaptic weight levels, for neurons that have  
705  $X_{PRE}(t) = 1$ , update synaptic conductance using  $g(t) = g(t) + w(t)$ ,
- 706 5. set  $t = t + dt$ .

707 *Figure 10* illustrates the evolution of all of the learning rule variables over a brief time window.  
708 Cortical spikes (thin straight light lines, top panel) can drive voltage spikes of dMSNs (dark curves,  
709 top panel), which in turn may or may not contribute to action selection (green – for  $L$  – and orange  
710 – for  $R$  – dots, top panel). Each time a dMSN fires, its eligibility trace will deviate from baseline  
711 according to the STDP rule in *Equation 7*. In this example, the rewards are  $r_L = 0.7$  and  $r_R = 0.1$ ,  
712 such that every performance of  $L$  leads to an appreciable surge in  $K_{DA}$ , with an associated rise in  
713  $Q_L$ , but performances of  $R$  do not cause such large increases in  $K_{DA}$  and  $Q_R$ .

714 Various time points are labeled in the top panel of *Figure 10*. At time A,  $R$  is selected. The  
715 illustrated  $R$ -dMSN fires just before this time and hence its eligibility increases. There is a small  
716 increase in  $K_{DA}$  leading to a small increase in the  $w$  for this dMSN. At time B,  $L$  is selected. Although  
717 it is difficult to detect at this resolution, the illustrated  $L$ -dMSN fires just after the action, such that  
718 its  $E$  becomes negative and the resulting large surge in  $K_{DA}$  causes a sizeable drop in  $w_L$ . At time C,  
719  $R$  is selected again. This time, the  $R$ -dMSN fired well before time C, so its eligibility is small, and  
720 this combines with the small  $K_{DA}$  increase to lead to a negligible increase in  $w_R$ . At time D, action  $L$   
721 is selected but the firing of the  $L$ -dMSN is sufficiently late after this that no change in  $w_L$  results.  
722 At time E,  $L$  is selected again. This time, the  $L$ -dMSN fires just before the action leading to a large  
723 eligibility and corresponding increase in  $w_L$ . Finally, at time F,  $L$  is selected. In this instance, the  
724  $R$ -dMSN fired just before selection and hence is eligible, causing  $w_R$  to increase when  $K_{DA}$  goes up.  
725 Although this weight change does not reflect correct learning, it is completely reasonable, since the  
726 physiological synaptic machinery has no way to know that firing of the  $R$ -dMSN did not contribute  
727 to the selected action  $L$ .

## 728 Learning rule parameters

729 The learning rule parameters have been chosen to capture various experimental observations,  
730 including some differences between dMSN and iMSNs. First, it has been shown that cortical inputs  
731 to dMSNs yield more prolonged responses with more action potentials than what results from  
732 cortical inputs to iMSNs (*Flores-Barrera et al., 2010*). Moreover, dMSNs spike more than iMSNs  
733 when both types receive similar cortical inputs (*Escande et al., 2016*). Hence, the effective weights  
734 of cortical inputs to dMSNs should be able to become stronger than those to iMSNs, which we  
735 encode by selecting  $w_{max}^D > w_{max}^I$ . This choice is also consistent with the observation that dMSNs  
736 are more sensitive to phasic dopamine than are iMSNs (*Dreyer et al., 2010; Richfield et al., 1989;*  
737 *Gonon, 1997; Keeler et al., 2014*). On the other hand, the baseline firing rates of iMSNs exceed  
738 the baseline of dMSNs (*Mallet et al., 2006*), and hence we take the initial condition for  $w(t)$  for the  
739 iMSNs greater than that for the dMSNs.

740 The relative values of other parameters are largely based on past computational work (*Baladron*  
741 *et al., 2017*), albeit with different magnitudes to allow shorter simulation times. The learning rate  
742  $\alpha_w$  for the dMSNs is chosen to be positive and larger than the absolute value of the negative rate  
743 value for the iMSNs. The parameters  $\Delta_{PRE}$ ,  $\Delta_{POST}$ ,  $\tau_E$ ,  $\tau_{PRE}$ , and  $\tau_{POST}$  have been assigned the same  
744 values for both types of neurons, keeping the relations  $\Delta_{PRE} > \Delta_{POST}$  and  $\tau_{PRE} > \tau_{POST}$ . Finally, the  
745 rest of the parameters have been adjusted to give reasonable learning outcomes.

## 746 Parameter values

747 We use the following parameter values in all of our simulations:  $\tau_{DOP} = 2\text{ ms}$ ,  $\Delta_{DA} = 6\text{ ms}$ ,  $\tau_g = 3\text{ ms}$ ,  
748  $\alpha = 0.05$  and  $c = 2.5$ . For both dMSNs and iMSNs, we set  $\Delta_{PRE} = 10$  (instead of  $\Delta_{PRE} = 0.1$ ; *Baladron*  
749 *et al. (2017)*),  $\Delta_{POST} = 6$  (instead of  $\Delta_{POST} = 0.006$ ; *Baladron et al. (2017)*),  $\tau_E = 3$  (instead of  $\tau_E = 150$ ;  
750 *Baladron et al. (2017)*),  $\tau_{PRE} = 9$  (instead of  $\tau_{PRE} = 3$ ; *Baladron et al. (2017)*), and  $\tau_{POST} = 1.2$  (instead  
751 of  $\tau_{POST} = 3$ ; *Baladron et al. (2017)*). Finally,  $\alpha_w = \{80, -55\}$  (instead of  $\alpha_w = \{12, -11\}$ ; *Baladron*  
752 *et al. (2017)*) and  $w_{max} = \{0.1, 0.03\}$  (instead of  $w_{max} = \{0.00045, 0\}$ ; *Baladron et al. (2017)*), where  
753 the first value refers to dMSNs and the second to iMSNs. Note that different reward values,  $r_i$ , were  
754 used in different types of simulations, as explained in the associated text.

## 755 Learning rule initial conditions

756 The initial conditions used to numerically integrate the system are  $w = 0.015$  for weights of synapses  
757 to dMSNs and  $w = 0.018$  for iMSNs, with the rest of the variables relating to value estimation and  
758 dopamine modulation initialized to 0.

## 759 CBGT network

760 The spiking CBGT network is adapted from previous work (*Wei et al., 2015*). Like the STDP model  
761 described above, the CBGT network simulation is designed to decide between two actions, a  
762 left or right choice, based on incoming sensory signals (*Figure 1*). The full CBGT network was  
763 comprised of six interconnected brain regions (see *Table 3*), including populations of neurons in the  
764 cortex, striatum (STR), external segment of the globus pallidus (GPe), internal segment of the globus  
765 pallidus (GPi), subthalamic nucleus (STN), and thalamus. Because the goal of the full spiking network  
766 simulations was to probe the consequential effects of corticostriatal plasticity on the functional  
767 dynamics and emergent choice behavior of CBGT networks after learning has already occurred,  
768 CBGT simulations were conducted in the absence of any trial-to-trial plasticity, and did not include  
769 dopaminergic projections from the substantia nigra pars compacta. Rather, corticostriatal weights  
770 were manipulated to capture the outcomes of STDP learning as simulated with the learning network  
771 (*STDP network* section) under three different probabilistic feedback schedules (see *Table 4*), each  
772 maintained across all trials for that condition (N=2500 trials each).

## 773 Neural dynamics

774 To build on previous work on a two-alternative decision-making task with a similar CBGT network  
775 and to endow neurons in some BG populations with bursting capabilities, all neural units in the

776 CBGT network were simulated using the integrate-and-fire-or-burst model (*Smith et al., 2000*). Each  
 777 neuron's membrane dynamics were determined by:

$$C \frac{dV}{dt} = -g_L(V - V_L) - g_T h H(V - V_h)(V - V_T) - I_{syn} \quad (11)$$

778 In **Equation 11**, parameter values are  $C = 0.5 \text{ nF}$ ,  $g_L = 25 \text{ nS}$ ,  $V_L = -70 \text{ mV}$ ,  $V_h = -0.60 \text{ mV}$ , and  
 779  $V_T = 120 \text{ mV}$ . When the membrane potential reaches a boundary  $V_b$ , it is reset to  $V_r$ . We take  
 780  $V_b = -50 \text{ mV}$  and  $V_r = -55 \text{ mV}$ .

781 The middle term in the right hand side of **Equation 11** represents a depolarizing, low-threshold  
 782 T-type calcium current that becomes available when  $h$  grows and when  $V$  is depolarized above  
 783 a level  $V_h$ , since  $H(V)$  is the Heaviside step function. For neurons in the cortex, striatum (both  
 784 MSNs and FSIs), GPi, and thalamus, we set  $g_T = 0$ , thus reducing the dynamics to the simple leaky  
 785 integrate-and-fire model. For bursting units in the GPe and STN, rebound burst firing is possible,  
 786 with  $g_T$  set to  $0.06 \text{ nS}$  for both nuclei. The inactivation variable,  $h$ , adapts over time, decaying when  
 787  $V$  is depolarized and rising when  $V$  is hyperpolarized according to the following equations:

$$\frac{dh}{dt} = \frac{-h}{\tau_h}, \text{ when } V \geq V_h \quad (12)$$

788 and

$$\frac{dh}{dt} = \frac{1-h}{\tau_h^+}, \text{ when } V < V_h \quad (13)$$

789 with  $\tau_h^- = -20 \text{ ms}$  and  $\tau_h^+ = 100 \text{ ms}$  for both GPe and STN.

790 For all units in the model, the synaptic current  $I_{syn}$  reflects both the synaptic inputs from  
 791 other explicitly modeled populations of neurons within the CBGT network, as well as additional  
 792 background inputs from sources that are not explicitly included in the model. This current is  
 793 computed using the equation

$$I_{syn} = g_1 s_1 (V - V_E) + \frac{g_2 s_2 (V - V_E)}{1 + e^{-0.062V/3.57}} + g_3 s_3 (V - V_I), \quad (14)$$

794 The reversal potentials are set to  $V_E = 0 \text{ mV}$  and  $V_I = -70 \text{ mV}$ . The synaptic current components  
 795 correspond to AMPA ( $g_1$ ), NMDA ( $g_2$ ), and GABA<sub>A</sub> ( $g_3$ ) synapses. The gating variables  $s_i$  for AMPA and  
 796 GABA<sub>A</sub> receptor-mediated currents satisfy:

$$\frac{ds_i}{dt} = \sum_j \delta(t - t_j) - \frac{s_i}{\tau} \quad (15)$$

797 while NMDA receptor-mediated current gating obeys:

$$\frac{ds_3}{dt} = \alpha(1 - s_3) \sum_j \delta(t - t_j) - \frac{s_3}{\tau} \quad (16)$$

798 In **Equation 15** and **Equation 16**,  $t_j$  is the time of the  $j^{\text{th}}$  spike and  $\alpha = 0.63$ . The decay constant,  $\tau$ ,  
 799 was  $2 \text{ ms}$  for AMPA,  $5 \text{ ms}$  for GABA<sub>A</sub>, and  $100 \text{ ms}$  for NMDA-mediated currents. A time delay of  $0.2 \text{ ms}$   
 800 was used for synaptic transmission.

### 801 Network architecture

802 The CBGT network includes six of the nodes shown in **Figure 1**, excluding the dopaminergic pro-  
 803 jections from the substantia nigra pars compacta that are simulated in the STDP model. The  
 804 membrane dynamics, projection probabilities, and synaptic weights of the network (see **Table 3**)  
 805 were adjusted to reflect empirical knowledge about local and distal connectivity associated with  
 806 different populations, as well as resting and task-related firing patterns (*Wei et al., 2015; Lo and*  
 807 *Wang, 2006*).

808 The cortex included separate populations of neurons representing sensory information for  $L$   
 809 ( $N=270$ ) and  $R$  ( $N=270$ ) actions that approximate the processing in the intraparietal cortex or frontal

810 eye fields. On each trial, *L* and *R* cortical populations received excitatory inputs from an external  
811 source, sampled from a truncated normal distribution with a mean and standard deviation of 2.5 *Hz*  
812 and 0.06, respectively, with lower and upper limits of 2.4 *Hz* and 2.6 *Hz*. Critically, *L* and *R* cortical  
813 populations received the same strength of external stimulation on each trial to ensure that any  
814 observed behavioral effects across conditions were not the result of biased cortical input. Excitatory  
815 cortical neurons also formed lateral connections with other cortical neurons with a diffuse topology,  
816 or a non-zero probability of projecting to recipient neurons within and between action channels  
817 (see **Table 3** for details). The cortex also included a single population of inhibitory interneurons  
818 (CtxI; N=250 total) that formed reciprocal connections with left and right sensory populations. Along  
819 with external inputs, cortical populations received diffuse ascending excitatory inputs from the  
820 thalamus (Th; N=100 per input channel).

821 *L* and *R* cortical populations projected to dMSN (N=100/channel) and iMSN (N=100/channel)  
822 populations in the corresponding action channel; that is, cortical signals for a *L* action projected  
823 to dMSN and iMSN cells selective for *L* actions. Both cortical populations also targeted a generic  
824 population of FSI (N=100 total) providing widespread but asymmetric inhibition to MSNs, with  
825 stronger FSI-dMSN connections than FSI-iMSN connections (**Gittis et al., 2010**). Within each channel,  
826 dMSN and iMSN populations also formed recurrent and lateral inhibitory connections, with stronger  
827 inhibitory connections from iMSN to dMSN populations (**Gittis et al., 2010**). Striatal MSN populations  
828 also received channel-specific excitatory feedback from corresponding populations in the thalamus.  
829 Inhibitory efferent projections from the iMSNs terminated on populations of cells in the GPe, while  
830 the inhibitory efferent connections from the dMSNs projected directly to the GPi.

831 In addition to the descending inputs from the iMSNs, the GPe neurons (N=1000/channel)  
832 received excitatory inputs from the STN. GPe cells also formed recurrent, within channel inhibitory  
833 connections that supported stability of activity. Inhibitory efferents from the GPe terminated on  
834 corresponding populations in the the STN (i.e., long indirect pathway) and GPi (i.e., short indirect  
835 pathway). We did not include arkyppalldal projections (i.e., feedback projections from GPe to the  
836 striatum; **Mallet et al. (2012)**) as it is not currently well understood how this pathway contributes to  
837 basic choice behavior.

838 Similar to the GPe, STN populations were composed of bursting neurons (N=1000/channel) with  
839 channel-specific inhibitory inputs from the GPe as well as excitatory inputs from cortex (the hyperdi-  
840 rect pathway). The since no cancellation signals were modeled in the experiments (see *Simulations*  
841 *of experimental scenarios* subsection), the hyperdirect pathway was simplified to background input  
842 to the STN. Unlike the striatal MSNs and the GPe, the STN did not feature recurrent connections.  
843 Excitatory feedback from the STN to the GPe was assumed to be sparse but channel-specific,  
844 whereas projections from the STN to the GPi were channel-generic and caused diffuse excitation in  
845 both *L*- and *R*-encoding populations.

846 Populations of cells in the GPi (N=100/channel) received inputs from three primary sources:  
847 channel-specific inhibitory afferents from dMSNs in the striatum (i.e., direct pathway) and the  
848 corresponding population in the GPe (i.e., short indirect pathway), as well as excitatory projections  
849 from the STN shared across channels (i.e., long indirect and hyperdirect pathways; see **Table 3**).  
850 The GPi did not include recurrent feedback connections. All efferents from the GPi consisted of  
851 inhibitory projections to the motor thalamus. The efferent projections were segregated strictly into  
852 pathways for *L* and *R* actions.

853 Finally, *L*- and *R*-encoding populations in the thalamus were driven by two primary sources of  
854 input, integrating channel-specific inhibitory inputs from the GPi and diffuse (i.e., channel-spanning)  
855 excitatory inputs from cortex. Outputs from the thalamus delivered channel-specific excitatory  
856 feedback to corresponding dMSN and iMSN populations in the striatum as well as diffuse excitatory  
857 feedback to cortex.



**Table 3.** Synaptic efficacy ( $g$ ) and probability ( $P$ ) of connections between populations in the CBGT network, as well as postsynaptic receptor types (AMPA, NMDA, and GABA). The topology of each connection is labeled as either diffuse, to denote connections with a  $P > 0$  of projecting to left and right action channels, or focal, to denote connections that were restricted to within each channel.

| Connection | $P$   | $g$ (nS) | Topology | Receptor(s) |
|------------|-------|----------|----------|-------------|
| Ctx-Ctx    | 0.325 | 0.0127   | diffuse  | AMPA        |
| Ctx-Ctx    | 0.325 | 0.15     | diffuse  | NMDA        |
| Ctx-Ctxl   | 0.181 | 0.013    | diffuse  | AMPA        |
| Ctx-Ctxl   | 0.181 | 0.125    | diffuse  | NMDA        |
| Ctx-FSI    | 1.00  | 0.18     | diffuse  | AMPA        |
| Ctx-dMSN   | 1.00  | 0.225    | focal    | NMDA, AMPA  |
| Ctx-iMSN   | 1.00  | 0.225    | focal    | NMDA, AMPA  |
| Ctx-Th     | 0.87  | 0.0335   | diffuse  | NMDA, AMPA  |
| Ctxl-Ctxl  | 1.00  | 2.3125   | diffuse  | GABA        |
| Ctxl-Ctx   | 1.00  | 1.3125   | diffuse  | GABA        |
| dMSN-dMSN  | 0.34  | 0.28     | focal    | GABA        |
| dMSN-iMSN  | 0.34  | 0.28     | focal    | GABA        |
| dMSN-GPi   | 1.00  | 1.44     | focal    | GABA        |
| iMSN-iMSN  | 0.34  | 0.28     | focal    | GABA        |
| iMSN-dMSN  | 0.38  | 0.28     | focal    | GABA        |
| iMSN-GPe   | 1.00  | 3.05     | focal    | GABA        |
| FSI-FSI    | 1.00  | 2.45     | diffuse  | GABA        |
| FSI-dMSN   | 1.00  | 1.95     | diffuse  | GABA        |
| FSI-iMSN   | 1.00  | 1.85     | diffuse  | GABA        |
| GPe-GPe    | 0.05  | 1.50     | diffuse  | GABA        |
| GPe-STN    | 0.05  | 0.40     | focal    | GABA        |
| GPe-GPi    | 1.00  | 0.03     | focal    | GABA        |
| STN-GPe    | 0.12  | 0.07     | focal    | AMPA        |
| STN-GPe    | 0.12  | 4.00     | focal    | NMDA        |
| STN-GPi    | 1.00  | 0.078    | diffuse  | NMDA        |
| GPi-Th     | 1.00  | 0.142    | focal    | GABA        |
| Th-Ctx     | 0.625 | 0.015    | diffuse  | NMDA        |
| Th-Ctxl    | 0.625 | 0.015    | diffuse  | NMDA        |
| Th-dMSN    | 1.00  | 0.337    | focal    | AMPA        |
| Th-iMSN    | 1.00  | 0.337    | focal    | AMPA        |
| Th-FSI     | 0.625 | 0.30     | diffuse  | AMPA        |

858 Simulations of experimental scenarios

859 Because the STDP simulations did not reveal strong differences in Ctx-iMSN weights across reward  
 860 conditions, only Ctx-dMSN weights were manipulated across conditions in the full CBGT network  
 861 simulations. In all conditions the Ctx-dMSN weights were higher in the left (higher/optimal reward)  
 862 than in the right (lower/suboptimal reward) action channel (see **Table 4**). On each trial, external  
 863 input was applied to *L*- and *R*-encoding cortical populations, each projecting to corresponding

864 populations of dMSNs and iMSNs in the striatum, as well as to a generic population of FSIs. Critically,  
865 all MSNs also received input from the thalamus, which was reciprocally connected with cortex. Due  
866 to the suppressive effects of FSI activity on MSNs, sustained input from both cortex and thalamus  
867 was required to raise the firing rates of striatal projection neurons to levels sufficient to produce an  
868 action output. Due to the convergence of dMSN and iMSN inputs in the GPi, and their opposing  
869 influence over BG output, co-activation of these populations within a single action channel served  
870 to delay action output until activity within the direct pathway sufficiently exceeded the opposing  
871 effects of the indirect pathway (Wei et al., 2015). The behavioral choice, as well as the time of that  
872 decision (i.e., the RT) were determined by a winner-take-all rule with the first action channel to  
873 cause the average firing rate of its thalamic population to rise above a threshold of 30 Hz being  
874 selected.

**Table 4.** Corticostriatal weights in the CBGT network across levels of reward probability. Values of  $w$  were used to scale the synaptic efficacy of corticostriatal inputs ( $g_{\text{Ctx-MSN}}$ ) to the direct ( $D$ ) and indirect ( $I$ ) pathways within the left ( $L$ ) and right ( $R$ ) action channels.

|                      | $w_{D,L}$ | $w_{I,L}$ | $w_{D,R}$ | $w_{I,R}$ |
|----------------------|-----------|-----------|-----------|-----------|
| <b>P(rew   Left)</b> |           |           |           |           |
| Low                  | 1.01      | 1.00      | 0.99      | 1.00      |
| Med.                 | 1.02      | 1.00      | 0.97      | 1.00      |
| High                 | 1.035     | 1.00      | 0.945     | 1.00      |

#### 875 **Drift Diffusion Model**

876 To understand how altered corticostriatal weights influence decision-making behavior, we fit the  
877 simulated behavioral data from the CBGT network with a DDM (Ratcliff et al. (2016); Ratcliff (1978))  
878 and compared alternative models in which different parameters were allowed to vary across reward  
879 probability conditions. The DDM is an established model of simple two-alternative choice behavior,  
880 providing a parsimonious account of both the speed and accuracy of decision-making in humans  
881 and animal subjects across a wide variety of binary choice tasks (Ratcliff et al., 2016). It assumes  
882 that input is stochastically accumulated as the log-likelihood ratio of evidence for two alternative  
883 choices until reaching one of two decision thresholds, representing the criterion evidence for  
884 committing to a choice. Importantly, this accumulation-to-bound process affords predictions about  
885 the average accuracy, as well as the distribution of response times, under a given set of model  
886 parameters. The core parameters of the DDM include the rate of evidence accumulation, or drift  
887 rate ( $v$ ), the distance between decision boundaries, also referred to as the threshold ( $a$ ), the bias  
888 in the starting-point between boundaries for evidence accumulation ( $z$ ), and a non-decision time  
889 parameter that determines when accumulation of evidence begins ( $tr$ ), accounting for sensory and  
890 motor delays.

891 To narrow the subset of possible DDM models considered, DDM fits to the CBGT model behavior  
892 were conducted in three stages using a forward stepwise selection process. First, we compared  
893 models in which a single parameter in the DDM was free to vary across reward conditions. For these  
894 simulations all the DDM parameters were tested. Next, additional model fits were performed with  
895 the best-fitting model from the previous stage, but with the addition of a second free parameter.  
896 Finally, the two best fitting dual parameter models were submitted to a final round of fits in which  
897 trial-wise measures of striatal activity (see Figure 8B-C) were included as regressors on the two  
898 designated parameters of the DDM. All CBGT regressors were normalized between values of 0  
899 and 1. Each regression model included one regression coefficient capturing the linear effect of  
900 a given measure of neural activity on one of the free parameters (e.g.,  $a$ ,  $v$ , or  $z$ ), as well as an  
901 intercept term for that parameter, resulting in a total of four free parameters per selected DDM  
902 parameter or 8 free parameters altogether. For example, in a model where drift rate is estimated  
903 as function of the difference between dMSN firing rates in the left and right action channels, the

904 drift rate on trial  $t$  is given by  $v_j(t) = \beta_0^v + \beta_j^v \cdot X_j(t)$ , where  $\beta_0^v$  is the drift rate intercept,  $\beta_j^v$  is the beta  
905 coefficient for reward condition  $j$ , and  $X_j(t)$  is the observed difference in dMSN firing rates between  
906 action channels on trial  $t$  in condition  $j$ . A total of 24 separate regression models were fit, testing all  
907 possible combinations between the two best-fitting dual parameter models and the four measures  
908 of striatal activity summarized in *Figure 8B-C*.

909 Fits of the DDM were performed using HDDM (see *Wiecki et al. (2013)* for details), an open  
910 source Python package for Bayesian estimation of DDM parameters. Each model was fit by  
911 drawing 2000 Markov Chain Monte-Carlo (MCMC) samples from the joint posterior probability  
912 distribution over all parameters, with acceptance based on the likelihood (see *Navarro and Fuss*  
913 *(2009)*) of the observed accuracy and RT data given each parameter set. A burn-in period of 1200  
914 samples was implemented to ensure that model selection was not influenced by samples drawn  
915 prior to convergence. Sampling chains were also visually inspected for signs of convergence  
916 failure; however, parameters in all models showed normally distributed posterior distributions with  
917 little autocorrelation between samples suggesting that sampling parameters were sufficient for  
918 convergence. The prior distributions used to initialize all DDM parameters included in the fits can  
919 be found in *Wiecki et al. (2013)*.

## 920 Acknowledgments

921 C. Vich is supported by the Ministerio de Economía, Industria y Competitividad (MINECO), the  
922 Agencia Estatal de Investigación (AEI), and the European Regional Development Funds (ERDF)  
923 through projects MTM2014-54275-P, MTM2015-71509-C2-2-R and MTM2017-83568-P (AE/ERDF/EU).  
924 JR received support from NSF awards DMS 1516288, 1612913 (CRCNS), and 1724240 (CRCNS). TV  
925 received support from NSF CAREER award 1351748. The research was sponsored in part by the U.S.  
926 Army Research Laboratory, including work under Cooperative Agreement Number W911NF-10-2-  
927 0022, and the views espoused are not official policies of the U.S. Government.

## 928 Competing Interests

929 The authors declare no financial or non-financial competing interests.

## 930 References

- 931 **Afacan-Seref K**, Steinemann NA, Blangero A, Kelly SP. Dynamic Interplay of Value and Sensory Information in  
932 High-Speed Decision Making. *Current Biology*. 2018; 28(5):795–802.
- 933 **Alexander GE**, Crutcher MD. Functional architecture of basal ganglia circuits: neural substrates of parallel  
934 processing. *Trends Neurosci*. 1990 Jul; 13(7):266–271.
- 935 **Baladron J**, Nambu A, Hamker FH. The subthalamic nucleus-external globus pallidus loop biases exploratory  
936 decisions towards known alternatives: a neuro-computational study. *European Journal of Neuroscience*.  
937 2017; p. 1–14. doi: [10.1111/ejn.13666](https://doi.org/10.1111/ejn.13666).
- 938 **Balleine BW**, Delgado MR, Hikosaka O. The role of the dorsal striatum in reward and decision-making. *J Neurosci*.  
939 2007 Aug; 27(31):8161–8165.
- 940 **Baum CW**, Veeravalli VV. A sequential procedure for multihypothesis testing. *IEEE Transactions on Information*  
941 *Theory*. 1994; 40(6).
- 942 **Bogacz R**. Optimal decision-making theories: linking neurobiology with behaviour. *Trends in cognitive sciences*.  
943 2007; 11(3):118–125.
- 944 **Bogacz R**, Gurney K. The basal ganglia and cortex implement optimal decision making between alternative  
945 actions. *Neural computation*. 2007; 19(2):442–477.
- 946 **Bogacz R**, Larsen T. Integration of reinforcement learning and optimal decision-making theories of the basal  
947 ganglia. *Neural computation*. 2011; 23(4):817–851.
- 948 **Burnham KP**, Anderson DR. *Model Selection and Inference: A Practical Information-Theoretic Approach*, vol. 80;  
949 1998.

- 950 **Caballero JA**, Humphries MD, Gurney KN. A probabilistic, distributed, recursive mechanism for decision-making  
951 in the brain. *PLoS Comput Biol.* 2018 Apr; 14(4):e1006033.
- 952 **Churchland AK**, Kiani R, Shadlen MN. Decision-making with multiple alternatives. *Nat Neurosci.* 2008 Jun;  
953 11(6):693–702.
- 954 **Cohen JY**, Haesler S, Vong L, Lowell BB, Uchida N. Neuron-type-specific signals for reward and punishment in  
955 the ventral tegmental area. *Nature.* 2012 Jan; 482(7383):85–88.
- 956 **Collins AGE**, Frank MJ. Opponent actor learning (OpAL): modeling interactive effects of striatal dopamine on  
957 reinforcement learning and choice incentive. *Psychol Rev.* 2014 Jul; 121(3):337–366.
- 958 **Cui G**, Jun SB, Jin X, Pham MD, Vogel SS, Lovinger DM, Costa RM. Concurrent activation of striatal direct and  
959 indirect pathways during action initiation. *Nature.* 2013 Feb; 494(7436):238–242.
- 960 **Cui Y**, Paillé V, Xu H, Genet S, Delord B, Fino E, Berry H, Venance L. Endocannabinoids mediate bidirec-  
961 tional striatal spike-timing-dependent plasticity. *Journal of Physiology.* 2015; 593(13):2833 – 2849. doi:  
962 10.1113/jp270324.
- 963 **Ding L**, Gold JI. Caudate encodes multiple computations for perceptual decisions. *J Neurosci.* 2010 Nov;  
964 30(47):15747–15759.
- 965 **Donahue CH**, Liu M, Kreitzer A. Distinct value encoding in striatal direct and indirect pathways during adaptive  
966 learning. *bioRxiv.* 2018; <https://www.biorxiv.org/content/early/2018/03/07/277855>, doi: 10.1101/277855.
- 967 **Doya K.** Modulators of decision making. *Nat Neurosci.* 2008 Apr; 11(4):410–416.
- 968 **Draglia V**, Tartakovsky AG, Veeravalli VV. Multihypothesis sequential probability ratio tests. I. Asymptotic  
969 optimality. *IEEE Transactions on Information Theory.* 1999; 45(7):2448–2461.
- 970 **Dreyer JK**, Herrik KF, Berg RW, Hounsgaard JD. Influence of Phasic and Tonic Dopamine Release on Receptor  
971 Activation. *Journal of Neuroscience.* 2010; 30(42):14273–14283. doi: 10.1523/JNEUROSCI.1894-10.2010.
- 972 **Dunovan K**, Lynch B, Molesworth T, Verstynen T. Competing basal ganglia pathways determine the difference  
973 between stopping and deciding not to go. *Elife.* 2015; 4:e08723.
- 974 **Dunovan K**, Verstynen T. Believer-Skeptic meets Actor-Critic: Rethinking the role of basal ganglia pathways  
975 during decision-making and reinforcement learning. *Frontiers in neuroscience.* 2016; 10:106.
- 976 **Erlich JC**, Brunton BW, Duan CA, Hanks TD, Brody CD. Distinct effects of prefrontal and parietal cortex inactiva-  
977 tions on an accumulation of evidence task in the rat. *Elife.* 2015; 4:e05457.
- 978 **Escande MV**, Taravini IRE, Zold CL, Belforte JE, Murer MG. Loss of Homeostasis in the Direct Pathway in a  
979 Mouse Model of Asymptomatic Parkinson's Disease. *Journal of Neuroscience.* 2016; 36(21):5686–5698. doi:  
980 10.1523/JNEUROSCI.0492-15.2016.
- 981 **Eshel N**, Bukwich M, Rao V, Hemmelder V, Tian J, Uchida N. Arithmetic and local circuitry underlying dopamine  
982 prediction errors. *Nature.* 2015; 525(7568):243.
- 983 **Flores-Barrera E**, Vizcarra-Chacón B, Tapia D, Bargas J, Galarraga E. Different corticostriatal integration in spiny  
984 projection neurons from direct and indirect pathways. *Frontiers in Systems Neuroscience.* 2010; 4:15. doi:  
985 10.3389/fnsys.2010.00015.
- 986 **Fourcaud-Trocmé N**, Hansel D, van Vreeswijk C, Brunel N. How spike generation mechanisms determine the  
987 neuronal response to fluctuating inputs. *J Neurosci.* 2003 Dec; 23(37):11628–11640.
- 988 **Frank MJ.** Linking Across Levels of Computation in Model-Based Cognitive Neuroscience. In: *An Introduction to*  
989 *Model-Based Cognitive Neuroscience* Springer, New York, NY; 2015.p. 159–177.
- 990 **Frank MJ**, Gagne C, Nyhus E, Masters S, Wiecki TV, Cavanagh JF, Badre D. fMRI and EEG predictors of dynamic  
991 decision parameters during human reinforcement learning. *J Neurosci.* 2015 Jan; 35(2):485–494.
- 992 **Gardner MPH**, Conroy JS, Shaham MH, Styer CV, Schoenbaum G. Lateral Orbitofrontal Inactivation Dissociates  
993 Devaluation-Sensitive Behavior and Economic Choice. *Neuron.* 2017 Dec; 96(5):1192–1203.e4.
- 994 **Gittis AH**, Nelson AB, Thwin MT, Palop JJ, Kreitzer AC. Distinct roles of GABAergic interneurons in the regulation  
995 of striatal output pathways. *J Neurosci.* 2010; 30(6):2223–2234.

- 996 **Gold JJ**, Shadlen MN. The neural basis of decision making. *Annu Rev Neurosci.* 2007 Jan; 30(30):535–561.
- 997 **Gonon F.** Prolonged and Extrasynaptic Excitatory Action of Dopamine Mediated by D1 Receptors in the Rat  
998 Striatum In Vivo. *Journal of Neuroscience.* 1997; 17(15):5972–5978.
- 999 **Gurney KN**, Humphries MD, Redgrave P. A New Framework for Cortico-Striatal Plasticity: Behavioural The-  
1000 ory Meets In Vitro Data at the Reinforcement-Action Interface. *PLOS Biology.* 2015 01; 13(1):1–25. doi:  
1001 [10.1371/journal.pbio.1002034](https://doi.org/10.1371/journal.pbio.1002034).
- 1002 **Herz DM**, Little S, Pedrosa DJ, Tinkhauser G, Cheeran B, Foltynie T, Bogacz R, Brown P. Mechanisms Underlying  
1003 Decision-Making as Revealed by Deep-Brain Stimulation in Patients with Parkinson's Disease. *Current Biology.*  
1004 2018; 28(8):1169–1178.
- 1005 **Herz DM**, Zavala BA, Bogacz R, Brown P. Neural correlates of decision thresholds in the human subthalamic  
1006 nucleus. *Current Biology.* 2016; 26(7):916–920.
- 1007 **Izhikevich EM.** Dynamical systems in neuroscience: the geometry of excitability and bursting. *Computational*  
1008 *Neuroscience*, Cambridge, MA: MIT Press; 2007.
- 1009 **Jahfari S**, Ridderinkhof KR, Collins AGE, Knapen T, Waldorp L, Frank MJ. Cross-task contributions of fronto-basal  
1010 ganglia circuitry in response inhibition and conflict-induced slowing. *bioRxiv.* 2017; p. 199299.
- 1011 **Katz LN**, Yates JL, Pillow JW, Huk AC. Dissociated functional significance of decision-related activity in the primate  
1012 dorsal stream. *Nature.* 2016 Jul; 535(7611):285–288.
- 1013 **Keeler J**, Pretsell D, Robbins T. Functional implications of dopamine D1 vs. D2 receptors: a 'prepare and  
1014 select' model of the striatal direct vs. indirect pathways. *Neuroscience.* 2014; 282:156–175.
- 1015 **Kiani R**, Shadlen MN. Representation of confidence associated with a decision by neurons in the parietal cortex.  
1016 *science.* 2009; 324(5928):759–764.
- 1017 **Klaus A**, Martins GJ, Paixao VB, Zhou P, Paninski L, Costa RM. The Spatiotemporal Organization of the Striatum  
1018 Encodes Action Space. *Neuron.* 2017; 95(5):1171 – 1180.e7. doi: <https://doi.org/10.1016/j.neuron.2017.08.015>.
- 1019 **Kozlov AS**, Gentner TQ. Central auditory neurons display flexible feature recombination functions. *Journal of*  
1020 *Neurophysiology.* 2013; 111(6):1183–1189.
- 1021 **Krakauer JW**, Ghazanfar AA, Gomez-Marin A, MacIver MA, Poeppel D. Neuroscience needs behavior: correcting  
1022 a reductionist bias. *Neuron.* 2017; 93(3):480–490.
- 1023 **Kreitzer AC**, Malenka RC. Striatal Plasticity and Basal Ganglia Circuit Function. *Neuron.* 2008; 60(4):543 – 554.  
1024 doi: <https://doi.org/10.1016/j.neuron.2008.11.005>.
- 1025 **Latimer KW**, Yates JL, Meister MLR, Huk AC, Pillow JW. Single-trial spike trains in parietal cortex reveal discrete  
1026 steps during decision-making. *Science.* 2015 Jul; 349(6244):184–187.
- 1027 **Licata AM**, Kaufman MT, Raposo D, Ryan MB, Sheppard JP, Churchland AK. Posterior Parietal Cortex Guides  
1028 Visual Decisions in Rats. *J Neurosci.* 2017 May; 37(19):4954–4966.
- 1029 **Lo CC**, Wang XJ. Cortico-basal ganglia circuit mechanism for a decision threshold in reaction time tasks. *Nat*  
1030 *Neurosci.* 2006 Jun; 9(7):956–963.
- 1031 **Mallet N**, Ballion B, Le Moine C, Gonon F. Cortical Inputs and GABA Interneurons Imbalance Projection  
1032 Neurons in the Striatum of Parkinsonian Rats. *Journal of Neuroscience.* 2006; 26(14):3875–3884. doi:  
1033 [10.1523/JNEUROSCI.4439-05.2006](https://doi.org/10.1523/JNEUROSCI.4439-05.2006).
- 1034 **Mallet N**, Micklem BR, Henny P, Brown MT, Williams C, Bolam JP, Nakamura KC, Magill PJ. Dichotomous  
1035 Organization of the External Globus Pallidus. *Neuron.* 2012; 74(6):1075–1086.
- 1036 **Manohar SG**, Chong TTJ, Apps MAJ, Batla A, Stamelou M, Jarman PR, Bhatia KP, Husain M. Reward Pays the Cost  
1037 of Noise Reduction in Motor and Cognitive Control. *Curr Biol.* 2015 Jun; 25(13):1707–1716.
- 1038 **Marr D**, Poggio T. From understanding computation to understanding neural circuitry. . 1976; .
- 1039 **Mikhael JG**, Bogacz R. Learning Reward Uncertainty in the Basal Ganglia. *PLoS Comput Biol.* 2016 Sep;  
1040 12(9):e1005062.

- 1041 **Morris G**, Nevet A, Arkadir D, Vaadia E, Bergman H. Midbrain dopamine neurons encode decisions for future  
1042 action. *Nature Neuroscience*. 2006; 9:1057–1063.
- 1043 **Navarro DJ**, Fuss IG. Fast and accurate calculations for first-passage times in Wiener diffusion models. *J Math*  
1044 *Psychol*. 2009 Aug; 53(4):222–230.
- 1045 **Parker JG**, Marshall JD, Ahanonu B, Wu YW, Kim TH, Grewe BF, Zhang Y, Li JZ, Ding JB, Ehlers MD, et al. Diametric  
1046 neural ensemble dynamics in parkinsonian and dyskinetic states. *Nature*. 2018; 557(7704):177.
- 1047 **Pedersen ML**, Frank MJ, Biele G. The drift diffusion model as the choice rule in reinforcement learning.  
1048 *Psychonomic bulletin & review*. 2017; 24(4):1234–1251.
- 1049 **Polanía R**, Krajbich I, Grueschow M, Ruff CC. Neural Oscillations and Synchronization Differentially Support  
1050 Evidence Accumulation in Perceptual and Value-Based Decision Making. *Neuron*. 2014; 82(3):709–720.
- 1051 **Ratcliff R**. A theory of Memory Retrieval. *Psychol Rev*. 1978; 85(2):59–108.
- 1052 **Ratcliff R**, Frank MJ. Reinforcement-Based Decision Making in Corticostriatal Circuits: Mutual Constraints by  
1053 Neurocomputational and Diffusion Models. *Neural Comput*. 2012; 24:1186–1229.
- 1054 **Ratcliff R**, Smith PL, Brown SD, McKoon G. Diffusion Decision Model: Current Issues and History. *Trends Cogn*  
1055 *Sci*. 2016 Apr; 20(4):260–281.
- 1056 **Rescorla RA**, Wagner AR, et al. A theory of Pavlovian conditioning: Variations in the effectiveness of reinforce-  
1057 ment and nonreinforcement. *Classical conditioning II: Current research and theory*. 1972; 2:64–99.
- 1058 **Richfield EK**, Penney JB, Young AB. Anatomical and affinity state comparisons between dopamine D1  
1059 and D2 receptors in the rat central nervous system. *Neuroscience*. 1989; 30(3):767 – 777. doi:  
1060 [https://doi.org/10.1016/0306-4522\(89\)90168-1](https://doi.org/10.1016/0306-4522(89)90168-1).
- 1061 **Roesch MR**, Calu DJ, Schoenbaum G. Dopamine neurons encode the better option in rats deciding between  
1062 differently delayed or sized rewards. *Nature Neuroscience*. 2007; 10:1615–1624.
- 1063 **Schmidt R**, Leventhal DK, Mallet N, Chen F, Berke JD. Canceling actions involves a race between basal ganglia  
1064 pathways. *Nat Neurosci*. 2013 Aug; 16(8):1118–1124.
- 1065 **Schultz W**, Apicella P, Scarnati E, Ljungberg T. Neuronal activity in monkey ventral striatum related to the  
1066 expectation of reward. *J Neurosci*. 1992; 12(12):4595–4610.
- 1067 **Shadlen MN**, Newsome WT. Neural basis of a perceptual decision in the parietal cortex (area LIP) of the rhesus  
1068 monkey. *Journal of neurophysiology*. 2001; 86(4):1916–1936.
- 1069 **Shindou T**, Shindou M, Watanabe S, Wickens J. A silent eligibility trace enables dopamine-dependent synaptic  
1070 plasticity for reinforcement learning in the mouse striatum. *Eur J Neurosci*. 2018 Mar; .
- 1071 **Simen P**, Cohen JD, Holmes P. Rapid decision threshold modulation by reward rate in a neural network. *Neural*  
1072 *Netw*. 2006 Oct; 19(8):1013–1026.
- 1073 **Smith GD**, Cox CL, Sherman SM, Rinzel J. Fourier analysis of sinusoidally driven thalamocortical relay neurons  
1074 and a minimal integrate-and-fire-or-burst model. *J Neurophysiol*. 2000 Jan; 83(1):588–610.
- 1075 **Sutton RS**, Barto AG, Book aB. *Reinforcement Learning : An Introduction*. . 1998; .
- 1076 **Tecuapetla F**, Jin X, Lima SQ, Costa RM. Complementary contributions of striatal projection pathways to action  
1077 initiation and execution. *Cell*. 2016; 166(3):703–715.
- 1078 **Tecuapetla F**, Matias S, Dugue GP, Mainen ZF, Costa RM. Balanced activity in basal ganglia projection pathways  
1079 is critical for contraversive movements. *Nature communications*. 2014; 5:4315.
- 1080 **Tort ABL**, Komorowski RW, Manns JR, Kopell NJ, Eichenbaum H. Theta–gamma coupling increases during the  
1081 learning of item–context associations. *Proceedings of the National Academy of Sciences*. 2009; 106(49):20942–  
1082 20947. doi: [10.1073/pnas.0911331106](https://doi.org/10.1073/pnas.0911331106).
- 1083 **Wei W**, Rubin JE, Wang XJ. Role of the indirect pathway of the basal ganglia in perceptual decision making. *J*  
1084 *Neurosci*. 2015; 35(9):4052–4064.
- 1085 **Wichmann T**, DeLong MR. Functional and pathophysiological models of the basal ganglia. *Current Opinion in*  
1086 *Neurobiology*. 1996; 6(6):751 – 758. doi: [https://doi.org/10.1016/S0959-4388\(96\)80024-9](https://doi.org/10.1016/S0959-4388(96)80024-9).

- 1087 **Wiecki TV**, Frank MJ. A computational model of inhibitory control in frontal cortex and basal ganglia. *Psychol*  
1088 *Rev.* 2013 Apr; 120(2):329–355.
- 1089 **Wiecki TV**, Sofer I, Frank MJ. HDDM: hierarchical bayesian estimation of the drift-diffusion model in python.  
1090 *Frontiers in neuroinformatics.* 2013; 7:14.
- 1091 **Yartsev MM**, Hanks TD, Yoon AM, Brody CD. Causal contribution and dynamical encoding in the striatum during  
1092 evidence accumulation. *Elife.* 2018 Aug; 7:e34929.

1093 **Supplementary Figures**

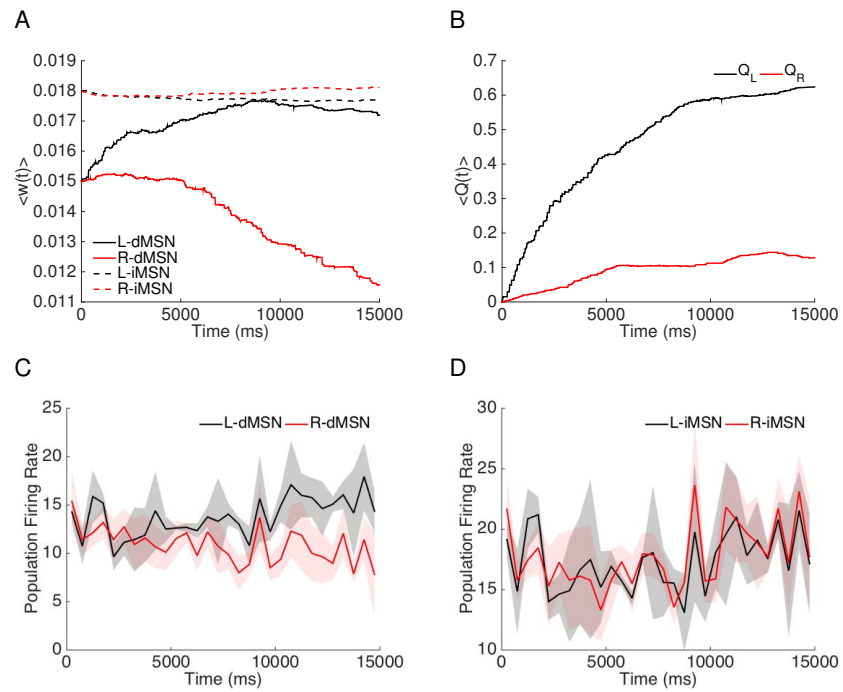

**Supplementary Figure 1.** Time courses of corticostriatal synapse weights and firing rates when the rewards are constant in time ( $r_L(t) = 0.7$  and  $r_R(t) = 0.1$ ). A: Averaged weights over 7 different realizations and over each of the four specific populations of neurons, which are dMSN selecting action  $L$  (solid black); dMSN selecting action  $R$  (solid red); iMSN countering action  $L$  (dashed black); iMSN countering action  $R$  (dashed red). B: Averaged evolution of the action values  $Q_L$  (black trace) and  $Q_R$  (red trace) over 7 different realizations. C: Firing rates of the dMSN populations selecting actions  $L$  (black) and  $R$  (red) over time. D: Firing rates of the iMSN populations countering actions  $L$  (black) and  $R$  (red) over time. Data in C,D was discretized into 50 ms bins. The transparent regions depict standard deviations.



## 1094 Appendix 1

### 1095 Results with step changes in action values

1096 In **Appendix 1 Figure 1** we show the results of a simulation experiment with the STDP model  
1097 in which the rewards associated with the  $L$  and  $R$  actions are switched after 5 sec. During  
1098 the  $L$ -action consolidation period (from second 2 to 5), the firing rate for the  $L$ -dMSNs  
1099 ( $D_L$ ) becomes higher than that for the  $R$ -dMSNs ( $D_R$ ). After 5 s, 20  $L$  actions have been  
1100 performed and the learning is almost consolidated, with  $Q_L(t)$  and  $Q_R(t)$  near  $r_L = 0.7$  and  
1101  $r_L = 0.1$  respectively (see first panel).

1102 After the switch, there is a period of confusion where, even though  $L$  action is no longer  
1103 the most rewarded, the network still shows a preference for  $L$  over  $R$ . Subsequently, the  
1104 network learns that the  $R$  action is now more valuable than the  $L$  action, and the  $D_R$  grows  
1105 while  $D_L$  decreases, such that eventually  $D_R > D_L$ . After 10.5 seconds or so, the rate of  
1106 selection of  $R$  consistently that for  $L$ , showing the network's capacity for adjusting to reward  
1107 changes.

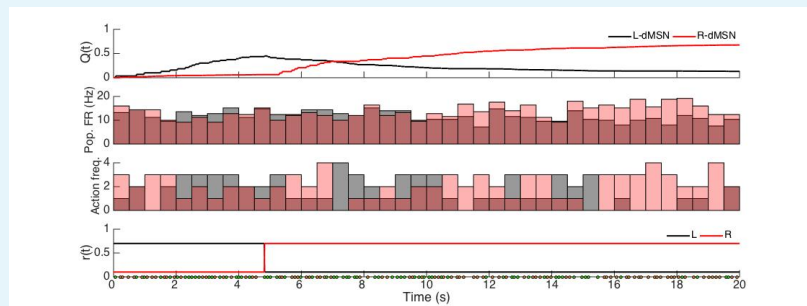

1108 **Appendix 1 Figure 1.** STDP results when the rewards associated with  $L$  and  $R$  actions are exchanged  
1109 after learning is underway. The first three panels represent, from top to bottom, the action values ( $Q(t)$ ),  
1110 the firing rates of dMSN neurons for each action ( $L$ , black;  $R$ , red), and the action frequency for the  
1111 dMSN population of neurons that produces the  $L$  action (black) and the  $R$  action (red). The bottom  
1112 panel represents the actual reward values for  $L$  (black) and  $R$  (red). The reward values switch when 20  $L$   
1113 actions have occurred.  
1115

## 1116 Appendix 2

### 1117 **Definitions of quantities computed from the STDP model**

1118 Averaged population firing rate

1119 We compute the firing rate of a neuron by adding up the number of spikes the neuron fires  
1120 within a time window and dividing by the duration of that window. The averaged population  
1121 firing rate is compute as the average of all neurons' firing rates over a population, given by

$$1122 \left\langle \frac{\sum_i s_i}{\Delta_t} \right\rangle_n$$

1123 where  $\Delta_t$  is the time window in  $ms$ ,  $s_i$  is the spike train corresponding to neuron  $i$ , and  $\langle \cdot \rangle_n$   
1124 denotes the mean over the  $n$  neurons in the population, The time course of the population  
1125 firing rate is computed this way, using a disjoint sequence of time windows with  $\Delta_t = 500 ms$ .

1126 Action frequency

1127 We compute the rate of a specific action  $i$  in a small window of  $\Delta = 500 ms$  as the number of  
1128 occurrences of action  $i$  within that window divided by  $\Delta$ .

1129 Mean behavioral learning curves across subjects

1130 The behavioral learning curves indicate, as functions of trial number, the fraction of trials  
1131 on which the more highly rewarded action is selected. Within a realization, using a sliding  
1132 trial count window of 5 trials, we computed fraction of preferred actions selected (number  
1133 of preferred actions divided by the total number of actions). Then we averaged over  $N$   
1134 realizations.

1135 Evolution of the mean (across subjects) difference in model-estimated action values

1136 Using  $N$  different realizations (simulating subjects in a behavioral experiment), we computed  
1137 the difference of the expected reward of action  $L$  and the expected reward of action  $R$  at the  
1138 time of each action selection (that is,  $Q_L(t^*) - Q_R(t^*)$ , where  $t^*$  is the time of action selection).  
1139 Notice that  $Q_i(t^*)$ , for  $i \in \{L, R\}$ , only changes when an action occurs. Moreover, to average  
1140 across realizations, we only considered the action number rather than the action onset time.
